1 **The landscape of DNA methylation associated with the**  
2 **transcriptomic network in laying hens and broilers generates insight**  
3 **into embryonic muscle development in chicken**

4

5

6 Zihao Liu<sup>‡</sup>, Xiaoxu Shen<sup>‡</sup>, Shunshun Han<sup>‡</sup>, Yan Wang<sup>‡</sup>, Qing Zhu, Can  
7 Cui, Haorong He, Jing Zhao, Yuqi Chen, Yao Zhang, Lin Ye, Zhichao  
8 Zhang, Diyan Li, Xiaoling Zhao and Huadong Yin<sup>#</sup>

9

10 Farm Animal Genetic Resources Exploration and Innovation Key Laboratory of  
11 Sichuan Province, Sichuan Agricultural University, Chengdu, Sichuan 611130, PR  
12 China

13

14 <sup>‡</sup> These authors contributed equally to this work.

15

16 <sup>#</sup> Corresponding author:

17 **Huadong Yin**, Farm Animal Genetic Resources Exploration and Innovation Key  
18 Laboratory of Sichuan Province, Sichuan Agricultural University, Chengdu, Sichuan  
19 611130, PR China. E-mail: [yinhuadong@sicau.edu.cn](mailto:yinhuadong@sicau.edu.cn)

20 **Abstract**

21 As DNA methylation is one of the key epigenetic mechanisms  
22 involved in embryonic development, elucidating its relationship with  
23 non-coding RNA and genes is essential for understanding early  
24 development. In this study, we performed single-base-resolution bisulfite  
25 sequencing together with RNA-seq to explore the genetic basis of  
26 embryonic muscle development in chicken. Comparison of methylome  
27 profiles between broilers and laying hens revealed that lower methylation  
28 in broilers might contribute to muscle development. Differential  
29 methylated region (DMR) analysis between two chicken lines showed  
30 that the majority of DMRs were hypo-DMRs for broilers. Differential  
31 methylated genes were significantly enriched in muscle  
32 development-related terms at E13 and E19. Furthermore, by constructing  
33 the network of the lncRNAs, we identified a lncRNA, which we named  
34 MYH1-AS, that potentially regulated muscle development. These  
35 findings reveal an integrative landscape of late period of embryonic  
36 myogenesis in chicken and give rise to a comprehensive understanding of  
37 epigenetic and transcriptional regulation, in skeletal muscle development.  
38 Our study provides a reliable data resource for further muscle studies.

39 **Keywords:** DNA methylation, lncRNA, chicken, muscle development

40

41

## 42 **Introduction**

43        Epigenetics mechanisms, including DNA methylation, histone  
44 modification, non-coding RNAs and chromatin remodeling, have been  
45 the subject of intense research over recent years because of their essential  
46 roles in various biological processes<sup>1,2</sup>. These epigenetic mechanisms  
47 have been reported to be involved in human diseases<sup>3</sup>, oogenesis and  
48 spermatogenesis<sup>4</sup> as well as in adipose and muscle development<sup>5-7</sup>. DNA  
49 methylation is an epigenetic mechanism that exerts considerable  
50 influence on the regulation of gene expression without changing the DNA  
51 sequence<sup>8</sup>. A role for DNA methylation in muscle development has been  
52 illustrated in human<sup>9</sup>, pig<sup>5,6</sup>, rabbit<sup>10</sup>, bovine<sup>11</sup> and chicken<sup>12</sup>.

53        The embryonic stage is critical for muscle development in mammals,  
54 as the number of muscle fibers in the developing embryo remains stable  
55 after birth. Previous reports have demonstrated a function of DNA  
56 methylation in embryonic muscle development. For instance, Carrio et  
57 al.<sup>13</sup> built the methylome of myogenic stem cells and demonstrated the  
58 importance of DNA methylation-mediated regulation of the cell-identity  
59 Myf5 super-enhancer during muscle-stem cell differentiation. Long  
60 noncoding RNAs have also been proven to be important in the regulation  
61 of muscle development. For example, linc-MD1 interacts with miR-133  
62 and miR-135 to regulate the expression of transcription factors MAML1  
63 and MEF2C that activate muscle-specific gene expression<sup>7</sup>. Recently, the

64 regulatory relationship between DNA methylation and lncRNAs has  
65 drawn extensive research attentions and a database of methylation and  
66 lncRNA regulatory relationships has been built for human diseases  
67 studies<sup>14</sup>. However, studies on the role for this regulatory relationship in  
68 muscle development are limited. Zhang et al.<sup>5</sup> reported the function of the  
69 lincRNA and DNA methylation regulatory relationship in muscle  
70 development in pig. Yang et al.<sup>6</sup> revealed that DNA methylation  
71 potentially affects gene expression in skeletal muscle to influence the  
72 propensity for obesity and body size.

73 After long-term artificial breeding for different purposes, laying  
74 hens and broilers show great differences in the development of skeletal  
75 muscles. The skeletal muscle growth rate of broilers far exceeds that of  
76 laying hens even under optimal feeding conditions, and broilers can  
77 exhibit weights 5 times more than laying hens at 6 weeks of age. The  
78 comparatively similar genetic backgrounds and genomes of these two  
79 chicken lines allow for comparative studies of muscle development at the  
80 epigenetic level.

81 Several genome-wide methylation studies have been reported in  
82 chicken, and a relationship between DNA methylation level of promoters  
83 and expression level of genes were identified<sup>15-17</sup>. Furthermore, the global  
84 methylation landscape of muscle development was described in chicken  
85 using juvenile and later laying-period hens<sup>12</sup>. However, a role for DNA

86 methylation in chicken embryonic muscle development has not been fully  
87 clarified.

88 Here we used whole genome bisulfite sequencing to determine the  
89 methylomes of 12 standardized broilers and 12 standardized laying hens.  
90 We sequenced the whole transcriptome of these 24 samples by RNA-seq  
91 simultaneously for the multi-Omics integrative analyses, to explore the  
92 effect of DNA methylation and lncRNA relationship on muscle  
93 development.

## 94 **Results**

### 95 **Overview of DNA methylation**

96 In the genomic methylation data among 24 samples (from 12  
97 broilers and 12 laying hens), the average sequence depth is about 30.3X.  
98 Approximately 3.4 billion reads were generated by the Illumina HiSeq in  
99 total and an average of 71.99% clean reads were mapped to the *Gallus*  
100 *gallus* genome (version 5.0) (Supplementary Table S1). The coverage  
101 analysis revealed that approximately 82% of the *Gallus gallus* genome  
102 were covered by reads at least one-fold, whereas nearly 78% of genome  
103 was covered by more than five-fold and 75% of genome was covered  
104 more than 10-fold (Supplementary Table S2). These results indicated a  
105 reliable sequencing outcome.

106 The methylation level of each developmental stages is displayed in  
107 Fig 1a, which indicates that the layers and broilers have a similar global

108 methylation profile. Similar proportions of CpGs in three sequence  
109 contexts (mCG, mCHG, and mCHH) were observed among four  
110 developmental stages (Fig. 1b). Next, the methylation level distributions  
111 of CpGs were analyzed at four developmental stages. In general, CpGs  
112 showed a high methylation level in the mCG context and a low  
113 methylation level in mCHG and mCHH contexts (Fig. 1c and  
114 Supplementary Fig. 1a). We then measured the methylation level of  
115 different regions of genes and compared these levels at different stages  
116 and populations. Interestingly, we found that broilers showed statistically  
117 lower methylation levels at all stages in the mCG context than layers (Fig.  
118 1d). We quantified the numbers of CpG islands (CGIs) in different  
119 regions at different stages (Supplementary Fig. 1b). More CGIs were  
120 located in gene promoter regions in broilers than layers, which indicates  
121 that methylation in CGIs may be involved in faster muscle development  
122 in broilers, as CGIs located at promoter regions are important for  
123 controlling gene expression.<sup>18</sup>.

124 We also examined the methylation level of lncRNAs assembled in  
125 RNA-seq using a similar approach and compared levels with the analysis  
126 of gene methylations. Generally, broilers still showed a lower methylation  
127 level in various types of lncRNAs in mCG and mCHH contexts compared  
128 with layers; similar methylation levels were observed among different  
129 types of lncRNAs (Fig. 2b and Supplementary Fig. 2c–d). Genes and

130 lncRNAs had similar global methylation levels and both showed  
131 significant difference in broilers compared with layers (Fig. 2a and  
132 Supplementary Fig. 2a–b). These results suggest that faster muscle  
133 development of broilers may be due to the lower methylation level in late  
134 embryonic stage compared with those in layers.

135 We also analyzed the genomic distribution patterns of DNA  
136 methylation in genes and lncRNAs. We divided the upstream region (2  
137 kb), first exon, first intron, internal exon, internal intron, last exon and  
138 downstream region (2 kb) of genes and lncRNAs across the genome as  
139 different features and their methylation levels were measured through 20  
140 bins. In general, the 5' upstream and 3' downstream regions showed lower  
141 methylation levels than other gene regions. We also compared the  
142 methylation level of features of genes with features of lncRNA (Fig. 2c–  
143 d). LncRNAs have relatively higher methylation levels around the  
144 transcription start site (TSS) compared with genes ( $P < 0.001$ ). In  
145 addition, methylation levels of different types of repeat regions were also  
146 analyzed across the genome. Beside the significant differences between  
147 broilers and layers, short interspersed nuclear elements (SINE) showed  
148 lower methylation levels across the four stages in the mCG context (Fig.  
149 3 and Supplementary Fig. 3).

#### 150 **Identification of differential methylation regions (DMRs) and genes.**

151 To explore the potential causes of the divergence in muscle

152 development between broilers and layers, the differential methylation loci  
153 were identified in DSS package. DMRs were identified in E10, E13, E16  
154 and E19 based on differential methylation loci. The DMRs were  
155 subsequently annotated to the genome, and the distribution of the DMRs  
156 in the whole genome was analyzed (Fig. 4a and Supplementary Table S4–  
157 S7). In general, the majority of DMRs was located in intronic regions,  
158 and a small portion of DMRs was distributed in the promoters of genes  
159 (Fig. 4a). Proportion analysis revealed that broilers had more  
160 hypomethylated regions across the genome in the four developmental  
161 stages, indicating that low methylation in muscle development-related  
162 genes may account for the fast muscle development in broilers (Fig. 4b).

163 Differential methylation genes (DMGs) were defined as genes with  
164 at least one overlapping DMR in its exon/intron regions. Gene Ontology  
165 (GO) enrichment analyses were then performed to investigate potential  
166 biological functions of the DMGs. In general the DMGs in the four  
167 developmental stages were most significantly enriched in terms related to  
168 the nervous system. However, many muscle-related terms were also  
169 found, especially for DMGs at E13 and E19, such as muscle organ  
170 development (47 genes; Q-value < 0.001), myotube cell development (12  
171 genes; Q-value < 0.005), positive regulation of muscle organ  
172 development (17 genes; Q-value < 0.001), and muscle cell differentiation  
173 (51 genes; Q-value < 0.003) (Fig. 4c, Supplementary Table S8–S11).



174 Because DMRs were not unanimous on the genomic position among  
175 different developmental stages, we merged the genomic position of  
176 DMRs from the 24 samples to generate common DMRs and re-calculated  
177 the methylation level for each common DMR. Clustering analysis was  
178 performed using the common DMRs and displayed using heatmap  
179 analysis. Different developmental stages were shown to cluster together,  
180 which is indicative of the high quality of sampling and DMR calling in  
181 this experiment (Fig. 5a). Moreover, the principle component analysis  
182 (PCA) result was consistent with the clustering analysis (Fig. 5b).

### 183 **Integrative analyses of DNA methylation and transcriptome**

184 To further explore whether methylation influences gene and lncRNA  
185 expression in chicken, RNA-seq was used to measure the expression of  
186 genes and identified lncRNAs. We identified 20656 lncRNAs in total.  
187 Most of the lncRNAs were lincRNAs (63.6%) (Fig. 6a, 6b). Heatmap of  
188 24 samples and PCA suggested developmental stages accounted for most  
189 variances (Fig. 6c). We divided genes and lncRNAs into four groups on  
190 the basis of their expression level (highest, medium high, medium low  
191 and lowest) using quantile method. We then measured methylation levels  
192 in different groups of genes and lncRNAs. In general, broilers and  
193 layering hens had similar methylation levels. A negative correlation was  
194 observed between genes and methylation of promoters in both broilers  
195 and layers: the highest expression level group showed the lowest

196 methylation level around the TSS, whereas the lowest expression level  
197 group showed the highest methylation level (Fig. 6d, e). Interestingly, the  
198 trend of negative correlation between expression and methylation was  
199 observed in downstream regions of lncRNAs but not around the TSS (Fig.  
200 6f, g). Moreover, the lncRNAs were usually methylated at higher levels  
201 around the TSS compared with genes (Fig. 6d–g).

202 Next, differential expression gene (DEG) and lncRNA (DEL) calling  
203 was performed, and the cis-targets and trans-targets of lncRNAs were  
204 predicted. The DMRs were assigned to lncRNAs generated from  
205 RNA-seq in this study (Supplementary Table S12–S15) and the  
206 differential methylation lncRNA (DM lncRNA) were defined as DEL that  
207 overlapped with DMR. The result showed that 55 DM lncRNAs were  
208 identified (13,16,11,15 in 4 stages, respectively) (Supplementary Table  
209 S16). We then searched for DM lncRNAs with potential in regulating  
210 muscle development. In particular, we found that the expression of one  
211 lncRNA (which we named as MYH1-AS; Fig. 7a) was highly correlated  
212 with the methylation level of the DMR assigned to it (Spearman,  
213  $Cor=-0.7513$ ,  $P < 10^{-4}$ ; Fig. 7b). The expression of MYH1-AS was  
214 detected to dramatically increase in broilers compared to laying hens at  
215 E16 and E19 (Fig 8a). As the lncRNA was predicted by lncTar to  
216 target several genes like MYH1A, MYH1G and MYH1E, the expression  
217 correlations between the lncRNA and its targets were calculated to search

218 for its most likely target. MYH1E showed the highest correlation with  
219 MYH1-AS (Fig. 7d), indicating MYH1E as a potential target of  
220 MYH1-AS. To further explore the role of MYH1-AS in muscle  
221 development, the gene-lncRNA networks were constructed based on their  
222 mRNA expression connectivity using WGCNA, and the subnetwork of  
223 MYH1-AS was extracted from the whole network. MYH1-AS had a high  
224 correlation with several muscle-related genes in this subnetwork (Fig. 7d).  
225 The relationship between the connectivity and correlation is shown in  
226 Figure 7f. Interestingly, genes that were highly negatively correlated with  
227 MYH1-AS did not show high connectivity with MYH1-AS. All genes  
228 showing high connectivity with MYH1-AS were also highly positively  
229 correlated with the lncRNA (Fig 7e-f). A total of 168 genes with both  
230 high connectivity and correlation with MYH1-AS, were selected to  
231 perform GO enrichment analysis to confirm the role of MYH1-AS in  
232 muscle (Fig. 7g and Supplementary S17). The results showed that the  
233 majority of terms enriched by these genes were muscle-related.

234 The expressions of MYH1-AS produced by RNA-seq were verified  
235 by qPCR and a similar trend was observed, indicating a reliable  
236 sequencing outcome (Fig 8 a, b). Subsequently, a siRNA was designed to  
237 perform MYH1-AS silencing assay. As shown in fig 8c, expression of  
238 MYH1-AS was significantly reduced after transfecting, indicative of  
239 efficiency of siRNA used in this experiment (Fig 8c). Then the mRNA

240 expression of muscle related genes (MyoD1, MyoG and MyH3) were  
241 measured at 48h after MYH1-AS silencing. It resulted in a reduced  
242 mRNA expression in silencing groups compared to control groups (Fig  
243 8d-f). Besides, the microscope was used to monitor the morphological  
244 change in myotubes after silencing. We found that MYH1-AS silencing  
245 resulted in a reduced number of myotube (Fig 8g-h). Further western blot  
246 assay revealed that the protein expression of MyhC and MyoG was  
247 repressed in silencing groups (Fig 8i). Those results suggest that lncRNA  
248 MYH1-AS may function in muscle differentiation.

## 249 **Discussion**

250 The chicken provides a unique model to perform embryology  
251 research because of the accessibility of egg. As chicken is an important  
252 food source for the human diet, the muscle development of chicken is an  
253 important topic worth of study. Here we used broilers and laying hens to  
254 explore the muscle development in chicken in the late embryonic period  
255 as they are artificially selected for different commercial use (depositing  
256 meat and laying eggs, respectively) thereby are divergent in muscle  
257 development. Because of the crucial role of methylation in  
258 embryogenesis, we performed whole genome bisulfite sequencing and  
259 RNA-seq to systematically explore the prenatal methylation landscape  
260 during chicken muscle development. Previous methylome studies have  
261 been performed using prenatal chicken or born chicken muscle<sup>12,19,20</sup>,

262 however, these studies failed to generate a comprehensive methylation  
263 landscape of embryonic stages. We focused on more systematical study at  
264 embryonic stage range from E10 to E19 between two chicken lines and  
265 aimed to elucidate the detail of embryonic muscle development.

266 The methylation level and proportion of different methylations  
267 (mCG, mCHG, mCHH) of each developmental stage indicated that layers  
268 and broilers have a similar global methylation profile. We also measured  
269 the methylation level of different types of CpG (Fig. 1e–g), and results  
270 were consistent with previous studies in chicken muscle<sup>15</sup>. The  
271 distribution proportions of CpG in the genome were different from those  
272 in the study of Zhang et al<sup>20</sup>, as the CpG proportions in repeat regions  
273 accounted for less genomic proportion in our study. One possibility for  
274 the discrepancy may be because the previous study used data from born  
275 chicken, whereas our analyses were performed in data from prenatal  
276 chicken. More studies are required to clarify these differences.

277 We next comprehensively compared the methylation level of genes  
278 and lncRNAs among different developmental stages and chicken lines  
279 (Fig. 2a). In general, layers showed a significantly higher methylation  
280 level than broilers in the mCG context in both genes and lncRNAs, which  
281 may be responsible for the differences in muscle development.  
282 Furthermore, we compared the methylation levels of different types of  
283 lncRNAs (sense, intronic, antisense and lincRNA) and there were no

284 significant differences, although layers and broilers still revealed  
285 significant variances. Next, genomic methylation around genes and  
286 lncRNAs were measured across the genome, and the TSSs were found to  
287 be low methylated in genes (Fig. 2c). The broilers and layers showed  
288 similar trends around the TSS, which is consistent with patterns reported  
289 in previous studies in chicken<sup>12,15</sup>, as well as in bovine muscle tissue<sup>11</sup> and  
290 pig<sup>21</sup>. However, the TSSs of lncRNAs were usually methylated at higher  
291 levels compared with genes, which may explain why mRNA expression  
292 of lncRNAs are usually lower than genes ( $P < 10^{-8}$ ) because methylation  
293 events in the promoter region usually affect gene expression<sup>22</sup>. In addition,  
294 the methylation levels of different types of transpose elements (TEs)  
295 (SINE, LINE, LTR, DNA and satellites) were also measured and TEs  
296 were methylated at higher levels in layers compared with broilers. TEs  
297 are usually inactivated in animals but were reported to function in the  
298 early development of human and other mammals to provide  
299 cis-regulatory elements that coordinate the expression of groups of  
300 genes<sup>23</sup>. As epigenetic regulation is important for the activity of TEs<sup>24</sup>,  
301 these differences in the two chicken lines may also account for the  
302 divergence in development.

303 The clustering heatmap and PCA were performed using common  
304 DMRs among four developmental stages. The expected classifications  
305 were observed in both analyses, indicating the reliable outcomes of

306 sequencing and DMR calling. Moreover, we found that DMRs between  
307 two chicken lines mainly distributed in intron regions and intergenic  
308 regions. These results are consistent with previous studies in chicken<sup>12</sup>,  
309 indicative of the important role of methylation in development regulation.  
310 However, as methylation in gene body region affects gene expression in  
311 several sophisticated ways<sup>18</sup>, further studies on how methylation of the  
312 intron regions can influence gene expression are required to elucidate the  
313 complicated epigenetic mechanism underlying muscle development in  
314 chickens. We analyzed the proportion of hypermethylated and  
315 hypomethylated regions and the majority of DMRs were detected to be  
316 hypomethylated regions in broilers, indicating that low methylation may  
317 be responsible for fast muscle development. This result is consistent with  
318 the preceding results in this study. Genes with overlapped with DMR at  
319 different times were regarded as DMGs and used for GO enrichment  
320 analysis. We found that DMGs at E13 and E19 were significantly  
321 enriched in muscle-related terms, suggesting that methylation plays an  
322 important role in embryonic stage muscle development. Additionally,  
323 DMGs among four stages were significantly enriched in nerve  
324 development-related terms, which may relate to the impact of  
325 domestication and artificial breeding. Integrative analysis was conducted  
326 to study the association between methylation level and mRNA expression.  
327 We noticed that mRNA level and methylation level around TSSs were

328 negatively correlated in genes but not lncRNAs, indicating that DNA  
329 methylation regulates lncRNA expression in a more complex way than  
330 gene expression.

331 To explore which lncRNA may potentially influence muscle  
332 development, the DM lncRNAs were identified and the correlation  
333 between DM lncRNA and the assigned DMR were measured. In  
334 particular, MYH1-AS showed a high correlation with its target MYH1E  
335 and the DMR located in its intron region. Further WGCNA analysis  
336 revealed that several muscle-related genes were highly correlated with  
337 MYH1-AS in its subnetwork. For example, *MYLK2*, a muscle-specific  
338 gene, expresses skMLCK specifically in skeletal muscles<sup>25,26</sup>. *ABLIM1*  
339 was reported to be related to muscle weakness and atrophy<sup>27</sup>. Increased  
340 *PDK4* expression may be required for the stable modification of the  
341 regulatory characteristics of PDK observed in slow-twitch muscle in  
342 response to high-fat feeding<sup>28</sup>, and other genes in the network, such as  
343 *MyoZ1*, *MYPN* and *ZBTB16* genes, were also revealed to be muscle- or  
344 meat quality-related genes<sup>29-32</sup>. This indicates that MYH1-AS may  
345 function in muscle development. Notably, as we noticed that high  
346 correlation did not exactly indicate high connectivity (Fig. 7f), we also  
347 performed GO enrichment analysis using 168 genes, which had top 50%  
348 both high connectivity and correlation values with MYH1-AS in its  
349 network as input. The majority of the resulting GO terms were



350 muscle-related terms (Fig. 7f–g), which is strongly indicative of  
351 MYH1-AS functioning in muscle development. Therefore, these results  
352 suggest that MYH1-AS is regulated by DNA methylation and participates  
353 in muscle development during embryonic stages. Subsequent silencing  
354 and western blot assay verified our analysis results, suggesting the  
355 reliability of our analysis and the role of MYH1-AS in muscle  
356 differentiation. However, how the lncRNA regulates muscle development  
357 requires more studies.

358 Our experiment revealed a comprehensive DNA methylome and  
359 transcriptome landscape during embryonic developmental stages. We  
360 identified one lncRNA, MYH1-AS, that may potentially play a part in  
361 muscle development in chicken, and our study provides evidence for this  
362 conclusion. Moreover, we provided a basis and a reliable resource for  
363 further investigating the genetic regulation of methylation and gene  
364 expression in embryonic chicken. However, more studies are needed to  
365 elucidate the detailed mechanism on how DNA methylation impacts  
366 lncRNA expression and how the lncRNA regulates myogenesis.

### 367 **Acknowledgements**

368 We thank Edanz Group ([www.edanzediting.com/ac](http://www.edanzediting.com/ac)) for editing a  
369 draft of this manuscript.

### 370 **Materials and Methods**

#### 371 **Sample collection**

372 The fertilized eggs of Rose and WhiteLoghorn were incubated in the  
373 same condition. The breast muscle and blood were collected at E10, E13,  
374 E16, E19. After sex determination, only samples identified as male were  
375 kept for next experiment. A total of 24 embryonic chicken were used in  
376 the study to form eight groups: E10, E13, E16, E19 for Rose and  
377 WhiteLoghorn, respectively. Each group included 3 individuals as  
378 biological replicates.

### 379 **DNA and RNA extraction**

380 Genomic DNA was extracted using an animal genomic DNA kit  
381 (Tiangen, China) following the manufacturer's instructions. The DNA  
382 integrity and concentration were measured by agarose gel electrophoresis  
383 and NanoDrop spectrophotometer, respectively. Total RNA was isolated  
384 using TRIzol (TAKARA, Dalian, China) 110 reagent according to the  
385 manufacturers' instruction. RNA was reverse 111 transcribed by  
386 TAKARA PrimeScript™ RT reagent kit (TAKARA) 112 according to  
387 the manufacturers' instruction.

### 388 **Library construction and sequencing**

389 Bisulfite sequencing libraries were prepared using the TruSeq Nano  
390 DNA LT kit (Illumina, San Diego, CA, USA). The genomic DNAs were  
391 then fragmented into 100–300 bp by sonication (Covaris, USA) and  
392 purified using a MiniElute PCR Purification Kit (QIAGEN, Silicon  
393 Valley Redwood City, CA, USA). The fragmented DNAs were end

394 repaired and a single 'A' nucleotide was appended to the 3' end of each  
395 fragment. After ligating the DNAs to the sequencing adapters, the  
396 genomic fragments were bisulfite converted via a Methylation-Gold kit  
397 (ZYMO, Murphy Ave. Irvine, CA, USA). The converted DNA fragments  
398 were PCR amplified and sequenced as paired-end reads using the  
399 Illumina HiSeq xten platform by the Biomarker Technologies company  
400 (Beijing, China).

#### 401 **Data alignment and process**

402 The raw data in the FastQ format generated by the Illumina HiSeq  
403 were pre-processed by removing reads containing adapters, N (unknown  
404 bases) > 10%, and those which over 50% of the sequence exhibited low  
405 quality value (Qphred score  $\leq 10$ ). During the process, we also calculated  
406 the Q20, Q30, CG content for each sample data. The reads remained after  
407 this procedure were clean reads and used for subsequent analysis. The  
408 methylation data were aligned to reference genome *Gallus gallus* 5.0 by  
409 Bismark software<sup>33</sup>. Meanwhile, the number of aligned clean reads in  
410 unique position of reference genome were calculated as unique mapped  
411 reads number. The proportion of the number of aligned reads in the total  
412 number of reads was calculated as the mapping rate. Subsequently, the  
413 methylation level of single base was then calculated by the ratio of the  
414 number of methylated reads to the sum of total reads covered the locus.  
415 Finally, we used a binominal distribution test approach to determine

416 whether a locus was regarded as methylated locus with the criteria:  
417 coverage depth  $> 4$  and  $FDR < 0.05^{33}$ .

418 The transcriptional libraries were sequenced on an Illumina HiSeq  
419 xten platform at the Biomarker Technologies Company (Beijing, China).  
420 The obtained transcriptome data were filtered by removing sequences  
421 containing adaptors, low-quality reads (Q-value  $< 20$ ), and reads  
422 containing more than 10% of unknown nucleotides (N) and were aligned  
423 to reference genome *Gallus gallus* 5.0 by HISAT2<sup>34</sup> then the transcript  
424 assembly and FPKM calculation were performed using the StringTie<sup>35</sup>.  
425 Transcripts mapped to the coding genes of reference were used to  
426 subsequent differential expression gene calling.

#### 427 **LncRNA identification**

428 In order to identify the potential lncRNA, the assembled transcripts  
429 generated from the StringTie were submitted to CPC<sup>36</sup>, CNCI<sup>37</sup>, CPAT<sup>38</sup>  
430 and pfam<sup>39</sup> software with default parameters to predict the potential  
431 lncRNAs. Only transcripts predicted as lncRNA shared among four tools  
432 were regarded as candidate lncRNA. Then the cis-target gene of lncRNA  
433 were defined as neighbor gene in 100 kb genomic distance from the  
434 lncRNA and were identified using in-house script. The trans-target  
435 prediction of lncRNAs was performed by LncTar software<sup>40</sup>.

#### 436 **DMLs and DMRs calling**

437 The differential methylation locus (DMLs) and differential

438 methylation regions (DMRs) between broilers and layers at each  
439 comparison were detected separately using Dispersion Shrinkage for  
440 Sequencing Data (DSS) package in R<sup>41-44</sup>. The differential methylation  
441 regions (DMRs) were then calculated in with default parameters.  
442 Subsequently, DMRs were annotated using ChIPseeker package in R<sup>45</sup>.

443 Gene overlapped with at least one DMR is defined as differential  
444 methylation gene (DMG). Common DMRs among 4 developmental  
445 stages were identified by merging all positions of DMRs in 24 samples  
446 and re-calculating the methylation level for each merged DMR position  
447 with an average approach using mCpG data.

#### 448 **DEGs and DELs calling**

449 The differential expression genes (DEGs) calling and the differential  
450 expression lncRNA (DEL) calling between two populations at each time  
451 point were performed separately using the DEseq<sup>46</sup>. The results were  
452 filtering with the criteria: (1) fold change >2 (2) FDR<0.5. The transcripts  
453 satisfied both standards were regarded as DEGs or DELs.

#### 454 **Functional enrichment analysis and WGCNA analysis**

455 Gene ontology enrichment analyses were conducted for DMGs at  
456 E10, E13, E16, E19 comparisons respectively to explore their potential  
457 roles in muscle development. These analyses were performed by  
458 clusterProfiler package implemented in R<sup>47</sup>. A hypergeometric test was  
459 applied to map DMGs to terms in the GO database to search for

460 significantly enriched terms in DMGs compared to the genome  
461 background.

462 The WGCNA analysis was performed using WGCNA package  
463 implemented in R [ENREF 48](#)<sup>48</sup>. We used all the differential expression  
464 lncRNAs and all the genes as input. Then, variable coefficient was used  
465 to filter transcripts with low expression change. The variable coefficient  
466 was calculated as follow:  $C_v = \sigma/\mu$ . The  $\sigma$  is the standard deviation and  $\mu$   
467 represents the mean value of expression of input transcripts. Only  
468 transcripts with ranked top 30% high  $C_v$  value were used for WGCNA  
469 analysis. After the entire network was constructed, only genes with  
470 connectivity more than 0.15 were selected for subsequent subnetwork  
471 analysis.

#### 472 **Validation for RNA-seq by quantitative Real-time RCP(Q-PCR)**

473 Total RNA was purified and reversely transcribed into cDNA using  
474 PrimerScriptR RT reagent Kit with gDNA Eraser (Takara Biotechnology  
475 (Dalian) Co., Ltd) following the specification. Quantities of mRNA were  
476 then measured with qRT-PCR using a CFX96TM real-time PCR  
477 detection system (Bio-Rad, USA). The qRT-PCR assays were then  
478 performed with a volume of 20  $\mu$ L containing 10  $\mu$ L SYBR Green  
479 Mixture, 7  $\mu$ L deionized water, 1  $\mu$ L template of cDNA, 1  $\mu$ L of each  
480 primer and with following thermal conditions: 95 °C for 5 min, 45 cycles  
481 of 95 °C for 10 sec, 60 °C for 10 sec, 72 °C for 10 sec. Primer sequences

482 used for qRT-PCR assays are displayed in Supplementary Table 17.  
483  $\beta$ -actin gene was used as internal control. Each qPCR assay was carried  
484 out in triplicate. The relative gene expression was calculated by using the  
485  $2^{-\Delta\Delta C_t}$  method.

#### 486 **Cell cultures**

487 Post-hatch chickens (7-day-old commercial generation Avian broiler  
488 chicks) were purchased from Wenjiang Charoen Pokphand Livestock &  
489 Poultry Co., Ltd. The pectoralis muscle was removed and used for  
490 preparation of primary myogenic cultures. About 5 g of muscle was finely  
491 minced and treated with 0.1% collagenase I (Sigma, MO, USA) followed  
492 by 0.25% trypsin (Hyclone, UT, USA) to release cells. Then, the cell  
493 suspension was subjected to Percoll density centrifugation to separate  
494 myoblasts from contaminating myofibril debris and nonmyogenic cells.  
495 Cells were plated in 25 cm<sup>3</sup> cell culture bottles with complete medium  
496 [DMEM/F12 (Invitrogen, Carlsbad, CA) +15% FBS (Gibco, NY, USA)  
497 +10% horse serum (Hyclone, UT, USA) +1% penicillin-streptomycin  
498 (Solarbio, Beijing, China) +3% chicken embryo extraction]. The cells  
499 cultured at 37 °C and 5% CO<sub>2</sub> with saturating humidity, which were  
500 allowed to proliferate in growth medium for 2-4 d, and the medium was  
501 refresh every 24 h. To induce differentiation, satellite cells were grown to  
502 80% confluence in growth medium, and the replaced with differentiation  
503 medium composed of DMEM, 2% horse serum and 1%

504 penicillin-streptomycin, and the medium was refreshed every 24 h.

### 505 **LncRNA silencing**

506 Chicken satellite cells were cultivated in 6-well plates and  
507 transfected with siRNAs: 5'-GGAAGGGAGUAGGUGGUAATT-3' and  
508 5'-UUACCACCUACUCCCUUCCTT -3'; Sangon Biotech, Shanghai,  
509 China) when grown to a density of approximate 70% in plates. In contrast,  
510 control cells were transfected with negative siRNA with same other  
511 condition. The transfection reagent was Lipofectamine 3000 (Invitrogen,  
512 Carlsbad, CA, USA). The knockdown efficiency was assessed by  
513 quantitative RT-PCR of lncRNA MYH1-AS.

### 514 **Microscopy**

515 Cellular morphology was evaluated in differentiated myotubes by  
516 phase-contrast microscopy without preliminary fixation. Pictures were  
517 produced using the Olympus IX73 inverted microscope (OLYMPUS,  
518 Tokyo, Japan) and the Hamamatsu C11440 digital camera  
519 (HAMAMATSU, Shizuoka, Japan).

### 520 **Western blot assay**

521 The cells were collected from the cultures, placed in the RIPA lysis  
522 buffer on ice (BestBio, Shanghai, China). The whole proteins were  
523 subjected to 10% sodium dodecyl sulfate polyacrylamide gel  
524 electrophoresis (SDS-PAGE) and then transferred to polyvinylidene



525 fluoride membranes (PVDF; Millipore Corporation, Billerica, MA, USA).  
526 The PVDF membrane was incubated with 5% defatted milk powder at  
527 room temperature for 1 h, then incubation with the following specific  
528 primary antibodies at 4°C overnight: anti-MyoG (Abcam), anti-MyHC  
529 (Abcam) and anti- $\beta$ -Actin (Abcam). The secondary antibodies  
530 HRP-labeled rabbit IgG (Cell Signaling) were added at room temperature  
531 for 1h. Following each step, the membranes were washed five times with  
532 PBS-T for 3 min. The proteins were visualized by enhanced  
533 chemiluminescence (Amersham Pharmacia Biotech, Piscataway, NJ,  
534 USA) with a Kodak imager (Eastman Kodak, Rochester, NY, USA).  
535 Quantification of protein blots was performed using the Quantity One  
536 1-D software (version 4.4.0) (Bio-Rad, Hercules, CA, USA) on images  
537 acquired from an EU-88 image scanner (GE Healthcare, King of Prussia,  
538 PA, USA).

539

540

541

542

543

544

545

546

547 **Fig 1.** Genome-wide profiles of DNA methylation among different  
548 sample groups. **(a)** Genomic methylation level in either layers or broilers  
549 at E10, E13, E16, E19, respectively. Methylation level were range from 0  
550 to 1. **(b-d)** Proportion of mCpG in different genomic features at different  
551 developmental stages in mCG, mCHG and mCHH contexts, respectively.  
552 **(e-g)** Methylation level of CpGs was equally divided into 10 intervals and  
553 the percentage of each interval were measured using E10 as example.

554

555 **Fig 2.** Comparatively measurement of methylation level of genes  
556 and lncRNA. **(a)** Comparison of methylation level of genes or lncRNAs  
557 between layers and broilers in three different contexts. **(b)** Measurement  
558 of methylation level of different types of lncRNAs. \*  $P < 0.05$ , \*\*  $P < 0.01$   
559 for comparison between two chicken lines. The red star means the  
560 methylation level of layers is significantly higher than broilers whereas  
561 the green star represents an opposite result. **(c-d)** Genomic methylation  
562 around genes and lncRNAs were measured across the genome,  
563 respectively. Transcripts were separated into seven regions (upstream,  
564 first exon, first intron, inner exon, inner intron, last exon and downstream)  
565 and each region was equally divided into 20 bins for visualization.

566

567 **Fig 3.** Methylation level of different types of TEs using E19 as an  
568 example. **(a)** Comparatively measurement of methylation of SINE, LINE,

569 LTR, DNA, Satellite regions between two chicken lines in mCG context.

570 **(b)** Methylation of different types of TEs for upstream, body and  
571 downstream regions in three different contexts using 20 bins across the  
572 whole genome.

573

574 **Fig 4.** Analyses of DMRs at 4 developmental stages. DMR calling  
575 were performed in mCG, mCHG and mCHH, respectively. **(a)** Numbers  
576 of DMRs in different genomic features (promoter, exon, intron, intergenic,  
577 and UTR regions). **(b)** Relative proportion of hyper DMRs to hypo  
578 DMRs in different CpG contexts. **(c)** The results of Gene Ontology (GO)  
579 analysis for genes with overlapped with DMR. Only part of the terms was  
580 selected for display. The red color means GO-BP terms, the blue color  
581 means GO-CC terms whereas green color represents GO-MF terms. The  
582 number in bracket means number of genes enriched in a specific term.

583

584 **Fig 5.** Heatmap clustering analysis and PCA analysis. **(a)** Heatmap  
585 clustering using merged common DMRs among 24 samples (see  
586 Materials and Methods). **(b)** The result of PCA analysis using common  
587 DMRs among 24 samples. Only the first component and the second  
588 component were visualized.

589

590 **Fig 6.** LncRNAs identification and correlation analysis between

591 methylome and transcriptome. **(a)** Number of different types of lncRNAs  
592 in all developmental stages. **(b)** Venn diagram of lncRNAs identified  
593 through different software. **(c)** Hierarchical cluster analysis of lncRNAs  
594 using their expression level. Replicates were merged together in the  
595 analysis. **(d-g)** The genes and lncRNAs were divided into five groups  
596 based on their expression levels, respectively. Then the methylation level  
597 around TSS and TES of each group were measured using 20 bins across  
598 the whole genome for layers and broilers.

599

600 **Fig 7.** Comprehensive analysis of lncRNA MYH1-AS. **(a)**  
601 visualization of the transcript of MYH1-AS and DMR overlapped it. **(b)**  
602 Correlation between methylation of DMR and expression of MYHA-AS  
603 using Spearman method. **(c)** Correlation between expression of  
604 MYH1-AS and expression of its potential target MYH1E. **(d)** The whole  
605 gene-lncRNA network and subnetwork including MYH1-AS extracted  
606 from the entire network. **(e)** Relationship between correlation and  
607 connectivity of gene and MYH1-AS. The red points represent genes with  
608 both high connectivity and correlation with MYH1-A and were selected  
609 for subsequent GO analysis. **(f)** Comparison of connectivity value  
610 between genes selected (red points) and all genes with in the subnetwork  
611 (background). \*  $P < 0.05$ , \*\*  $P < 0.01$  for comparison between selected  
612 genes and background. **(g)** Results of GO analysis for genes selected.

613           **Fig 8. (a)** Expression level of MYH1-AS in layers and broilers at  
614 different developmental stages. **(b)** Verification of lncRNA MYH1-AS  
615 expression at four developmental stages by qPCR. **(c)** lncRNA Silencing  
616 efficiency. \*  $P < 0.05$ , \*\*  $P < 0.01$  for comparison between control and  
617 silenced group. **(d-f)** The mRNA expression of MyoD1, MyH3 and  
618 MyoG in control and MYH1-AS silenced groups, respectively. \*  $P < 0.05$ ,  
619 \*\*  $P < 0.01$  for comparison between control and silenced group. **(g-h)** The  
620 morphological changes in myotubes after silencing. **(8i)** The protein  
621 expression of MyHC and MyoG comparison between control and  
622 silenced group, respectively.

623

624

625

626

627

628

629

630

631

632

633

634

## 635 **References**

- 636 1. Goldberg, A. D., Allis, C. D. and Bernstein, E. 2007, Epigenetics: a landscape takes shape.  
637 *Cell*, **128**, 635-638.
- 638 2. Guttman, M., Amit, I., Garber, M., et al. 2009, Chromatin signature reveals over a  
639 thousand highly conserved large non-coding RNAs in mammals. *Nature*, **458**, 223.
- 640 3. Feinberg, A. P. 2007, Phenotypic plasticity and the epigenetics of human disease. *Nature*,  
641 **447**, 433-440.
- 642 4. Sanford, J. P., Clark, H. J., Chapman, V. M. and Rossant, J. 1987, Differences in DNA  
643 methylation during oogenesis and spermatogenesis and their persistence during early  
644 embryogenesis in the mouse. *Genes & Development*, **1**, 1039-1046.
- 645 5. Zhou, Z. Y., Li, A., Wang, L. G., et al. 2015, DNA methylation signatures of long intergenic  
646 noncoding RNAs in porcine adipose and muscle tissues. *Scientific Reports*, **5**, 15435.
- 647 6. Yang, Y., Liang, G., Niu, G., et al. 2017, Comparative analysis of DNA methylome and  
648 transcriptome of skeletal muscle in lean-, obese-, and mini-type pigs. *Scientific Reports*,  
649 **7**.
- 650 7. Cesana, M., Cacchiarelli, D., Legnini, I., et al. 2011, A long noncoding RNA controls  
651 muscle differentiation by functioning as a competing endogenous RNA. *Cell*, **147**,  
652 358-369.
- 653 8. Jaenisch, R. and Bird, A. 2003, Epigenetic regulation of gene expression: how the genome  
654 integrates intrinsic and environmental signals.
- 655 9. Miyata, K., Miyata, T., Nakabayashi, K., et al. 2015, DNA methylation analysis of human  
656 myoblasts during in vitro myogenic differentiation: de novo methylation of promoters of  
657 muscle-related genes and its involvement in transcriptional down-regulation. *Human  
658 Molecular Genetics*, **24**, 410-423.
- 659 10. Huszar, G. 1972, Developmental Changes of the Primary Structure and Histidine  
660 Methylation in Rabbit Skeletal Muscle Myosin. *Nature New Biology*, **240**, 260-264.
- 661 11. Huang, Y. Z., Sun, J. J., Zhang, L. Z., et al. 2014, Genome-wide DNA methylation profiles  
662 and their relationships with mRNA and the microRNA transcriptome in bovine muscle  
663 tissue (*Bos taurine*). *Scientific Reports*, **4**, 6546.
- 664 12. Zhang, M., Yan, F. B., Li, F., et al. 2017, Genome-wide DNA methylation profiles reveal  
665 novel candidate genes associated with meat quality at different age stages in hens.  
666 *Scientific Reports*, **7**, 45564.
- 667 13. Carrière, E., Déry, E., Villanueva, A., Lois, S., et al. 2015, Deconstruction of DNA methylation  
668 patterns during myogenesis reveals specific epigenetic events in the establishment of the  
669 skeletal muscle lineage. *Stem Cells*, **33**, 2025-2036.
- 670 14. Zhi, H., Li, X., Wang, P., et al. 2017, Lnc2Meth: a manually curated database of regulatory  
671 relationships between long non-coding RNAs and DNA methylation associated with  
672 human disease. *Nucleic Acids Research*.
- 673 15. Li, J., Li, R., Wang, Y., et al. 2015, Genome-wide DNA methylome variation in two  
674 genetically distinct chicken lines using MethylC-seq. *Bmc Genomics*, **16**, 1-13.
- 675 16. Li, Q., Wang, Y., Hu, X., Zhao, Y. and Li, N. 2015, Genome-wide Mapping Reveals  
676 Conservation of Promoter DNA Methylation Following Chicken Domestication. *Sci Rep*, **5**,  
677 8748.

- 678 17. Li, Q., Li, N., Hu, X., et al. 2011, Genome-wide mapping of DNA methylation in chicken.  
679 *Plos One*, **6**, e19428.
- 680 18. Jones, P. A. 2012, Functions of DNA methylation: islands, start sites, gene bodies and  
681 beyond. *Nature Reviews Genetics*, **13**, 484-492.
- 682 19. Li, S., Zhu, Y., Zhi, L., et al. 2016, DNA Methylation Variation Trends during the Embryonic  
683 Development of Chicken. *Plos One*, **11**, e0159230.
- 684 20. Hu, Y., Xu, H., Li, Z., et al. 2013, Comparison of the genome-wide DNA methylation  
685 profiles between fast-growing and slow-growing broilers. *Plos One*, **8**, e56411.
- 686 21. Wang, H., Wang, J., Ning, C., et al. 2017, Genome-wide DNA methylation and  
687 transcriptome analyses reveal genes involved in immune responses of pig peripheral  
688 blood mononuclear cells to poly I:C. *Scientific Reports*, **7**, 9709.
- 689 22. Lorincz, M. C., Dickerson, D. R., Schmitt, M. and Groudine, M. 2004, Intragenic DNA  
690 methylation alters chromatin structure and elongation efficiency in mammalian cells.  
691 *Nature Structural & Molecular Biology*, **11**, 1068-1075.
- 692 23. Garcia-Perez, J. L., Widmann, T. J. and Adams, I. R. 2016, The impact of transposable  
693 elements on mammalian development. *Development*, **143**, 4101-4114.
- 694 24. Waterland, R. A. and Jirtle, R. L. 2003, Transposable elements: targets for early nutritional  
695 effects on epigenetic gene regulation. *Molecular and cellular biology*, **23**, 5293-5300.
- 696 25. Kamm, K. E. and Stull, J. T. 2001, Dedicated myosin light chain kinases with diverse  
697 cellular functions. *Journal of Biological Chemistry*, **276**, 4527-4530.
- 698 26. Zhi, G., Ryder, J. W., Huang, J., et al. 2005, Myosin light chain kinase and myosin  
699 phosphorylation effect frequency-dependent potentiation of skeletal muscle contraction.  
700 *Proc Natl Acad Sci U S A*, **102**, 17519-17524.
- 701 27. Ohsawa, N., Koebis, M., Mitsuhashi, H., Nishino, I. and Ishiura, S. 2015, ABLIM1 splicing is  
702 abnormal in skeletal muscle of patients with DM 1 and regulated by MBNL, CELF and  
703 PTBP 1. *Genes to Cells*, **20**, 121-134.
- 704 28. Holness, M. J., Kraus, A., Harris, R. A. and Sugden, M. C. 2000, Targeted upregulation of  
705 pyruvate dehydrogenase kinase (PDK)-4 in slow-twitch skeletal muscle underlies the  
706 stable modification of the regulatory characteristics of PDK induced by high-fat feeding.  
707 *Diabetes*, **49**, 775-781.
- 708 29. Ying, F., Gu, H., Xiong, Y. and Zuo, B. 2017, Analysis of differentially expressed genes in  
709 gastrocnemius muscle between DGAT1 transgenic mice and wild-type mice. *BioMed  
710 research international*, **2017**.
- 711 30. Caremani, M., Yamamoto, D. L., Nigro, V., Lombardi, V., Bang, M. L. and Linari, M. 2014,  
712 The Role of Myopalladin in Skeletal Muscle. *Biophysical Journal*, **106**, 767a.
- 713 31. Shum, A. M., Mahendradatta, T., Taylor, R. J., et al. 2012, Disruption of MEF2C signaling  
714 and loss of sarcomeric and mitochondrial integrity in cancer-induced skeletal muscle  
715 wasting. *Aging (Albany NY)*, **4**, 133.
- 716 32. Luo, B., Ye, M., Xu, H., et al. 2018, Expression analysis, single-nucleotide polymorphisms  
717 of the Myoz1 gene and their association with carcass and meat quality traits in chickens.  
718 *Italian Journal of Animal Science*, 1-9.
- 719 33. Krueger, F. and Andrews, S. R. 2011, Bismark: a flexible aligner and methylation caller for  
720 Bisulfite-Seq applications. *Bioinformatics*, **27**, 1571-1572.
- 721 34. Kim, D., Langmead, B. and Salzberg, S. L. 2015, HISAT: a fast spliced aligner with low

- 722 memory requirements. *Nature Methods*, **12**, 357.
- 723 35. Perteua, M., Perteua, G. M., Antonescu, C. M., Chang, T. C., Mendell, J. T. and Salzberg, S. L.  
724 2015, StringTie enables improved reconstruction of a transcriptome from RNA-seq reads.  
725 *Nature Biotechnology*, **33**, 290-295.
- 726 36. Kong, L., Zhang, Y., Ye, Z. Q., et al. 2007, CPC: assess the protein-coding potential of  
727 transcripts using sequence features and support vector machine. *Nucleic Acids Research*,  
728 **35**, W345.
- 729 37. Sun, L., Luo, H., Bu, D., et al. 2013, Utilizing sequence intrinsic composition to classify  
730 protein-coding and long non-coding transcripts. *Nucleic Acids Research*, **41**, e166.
- 731 38. Wang, L., Park, H. J., Dasari, S., Wang, S., Kocher, J. P. and Wei, L. 2013, CPAT:  
732 Coding-Potential Assessment Tool using an alignment-free logistic regression model.  
733 *Nucleic Acids Research*, **41**, e74-e74.
- 734 39. Finn, R. D., Tate, J., Mistry, J., et al. 2011, A: The Pfam protein families database. *Nucleic*  
735 *Acids Research*, **32**, D138.
- 736 40. Li, J., Ma, W., Zeng, P., et al. 2015, LncTar: a tool for predicting the RNA targets of long  
737 noncoding RNAs. *Briefings in Bioinformatics*, **16**, 806.
- 738 41. Wu, H., Wang, C. and Wu, Z. 2012, A new shrinkage estimator for dispersion improves  
739 differential expression detection in RNA-seq data. *Biostatistics*, **14**, 232-243.
- 740 42. Feng, H., Conneely, K. N. and Wu, H. 2014, A Bayesian hierarchical model to detect  
741 differentially methylated loci from single nucleotide resolution sequencing data. *Nucleic*  
742 *acids research*, **42**, e69-e69.
- 743 43. Wu, H., Xu, T., Feng, H., et al. 2015, Detection of differentially methylated regions from  
744 whole-genome bisulfite sequencing data without replicates. *Nucleic acids research*, **43**,  
745 e141-e141.
- 746 44. Park, Y. and Wu, H. 2016, Differential methylation analysis for BS-seq data under general  
747 experimental design. *Bioinformatics*, **32**, 1446-1453.
- 748 45. Yu, G., Wang, L. G. and He, Q. Y. 2015, ChIPseeker: an R/Bioconductor package for ChIP  
749 peak annotation, comparison and visualization. *Bioinformatics*, **31**, 2382-2383.
- 750 46. Anders, S., McCarthy, D. J., Chen, Y., et al. 2013, Count-based differential expression  
751 analysis of RNA sequencing data using R and Bioconductor. *Nature Protocols*, **8**, 1765.
- 752 47. Yu, G., Wang, L.-G., Han, Y. and He, Q.-Y. 2012, clusterProfiler: an R package for  
753 comparing biological themes among gene clusters. *Omics: a journal of integrative*  
754 *biology*, **16**, 284-287.
- 755 48. Langfelder, P. and Horvath, S. 2008, WGCNA: an R package for weighted correlation  
756 network analysis. *BMC bioinformatics*, **9**, 559.

757



**Fig 1a****Methylation Level of Different Developmental Stages**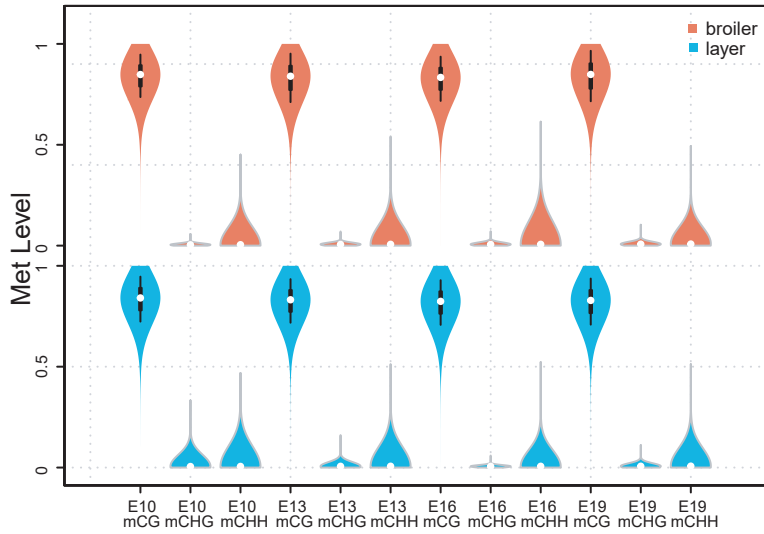**Fig 1b**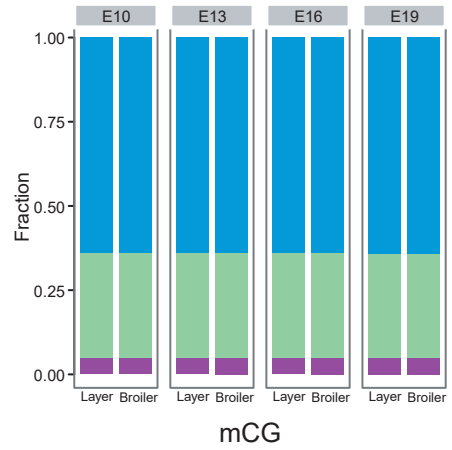**Fig 1c**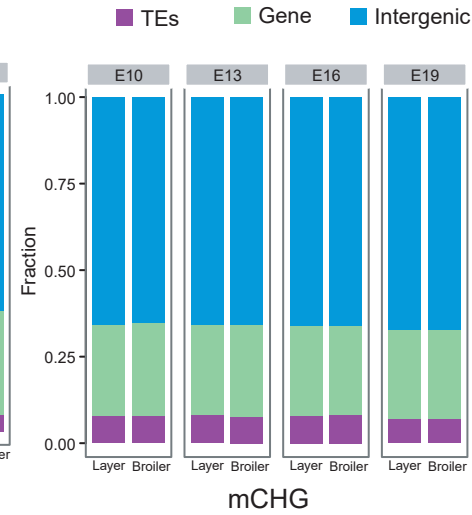**Fig 1d**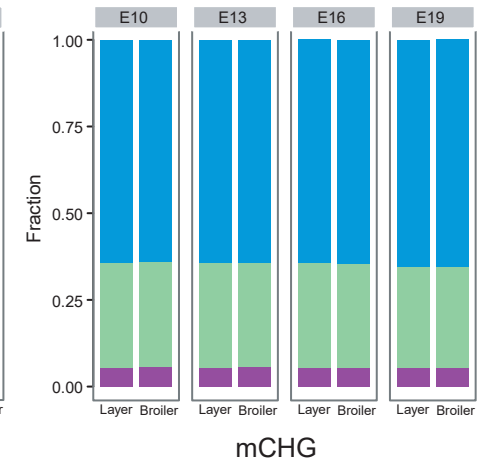**Fig 1e**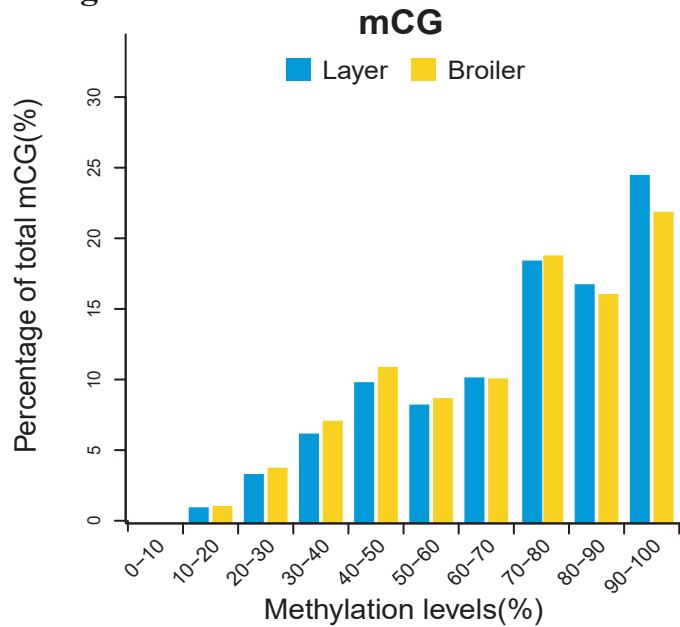**Fig 1f**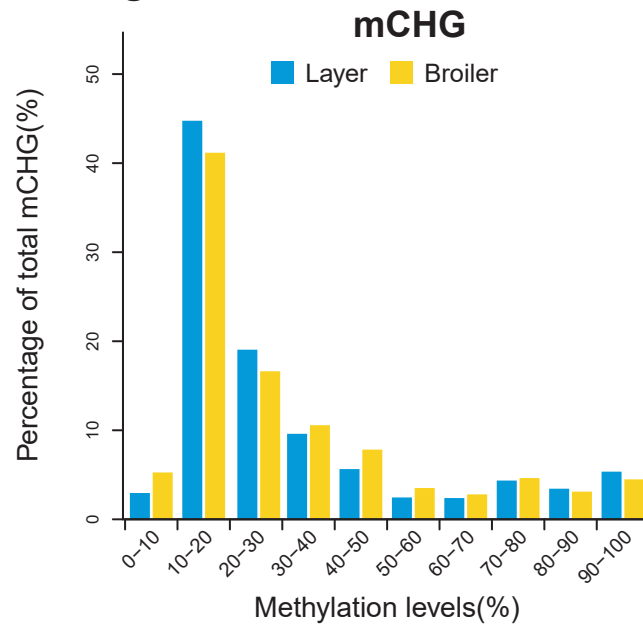**Fig 1g**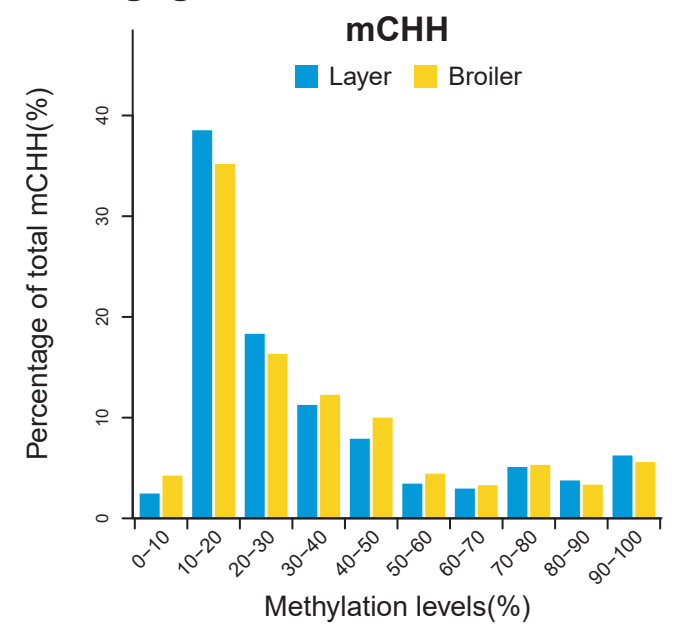

**Fig 2a**

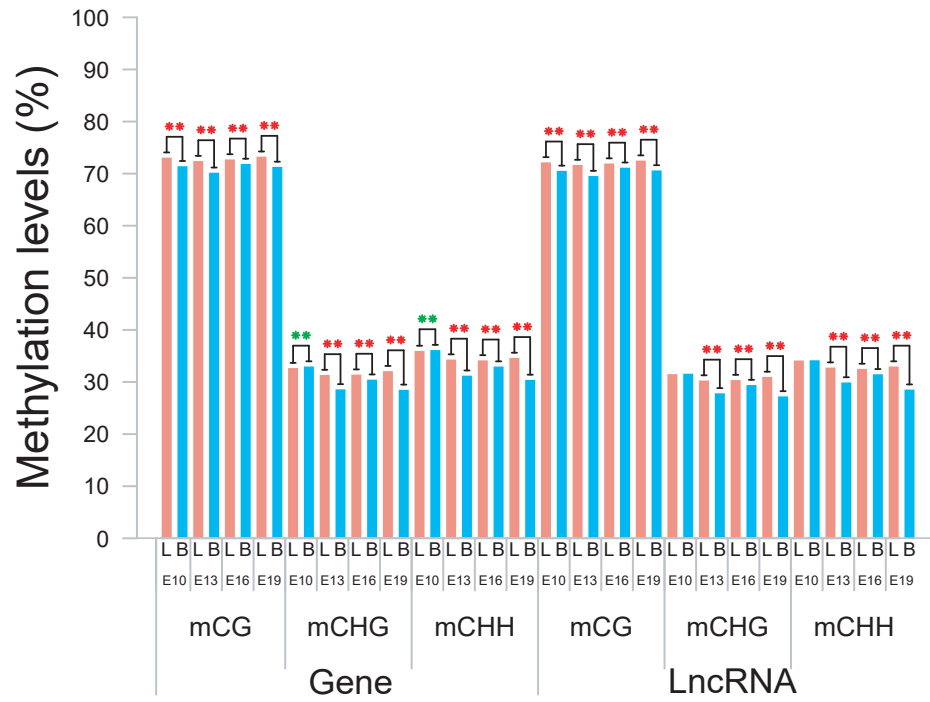

**Fig 2b**

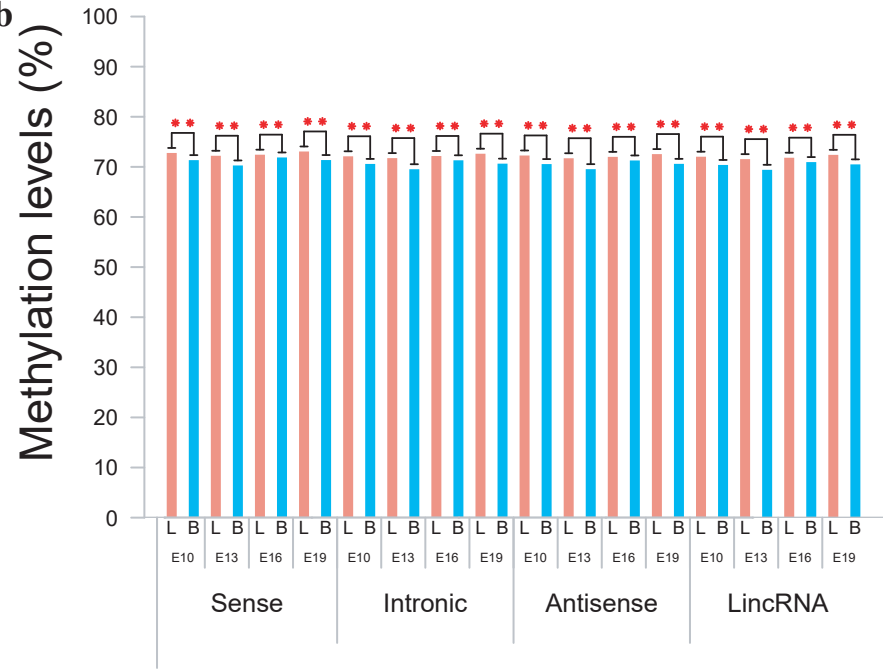

**Fig 2c**

**Methylation Level of of CG/CHG/CHH of Different Gene Elements**

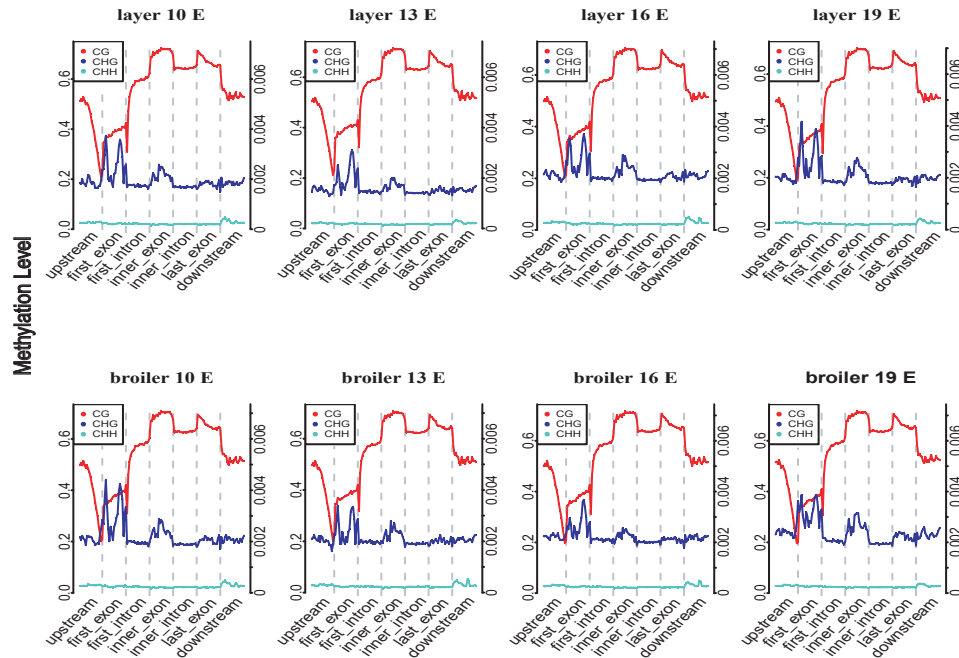

**Fig 2d**

**Methylation Level of of CG/CHG/CHH of Different Gene Elements**

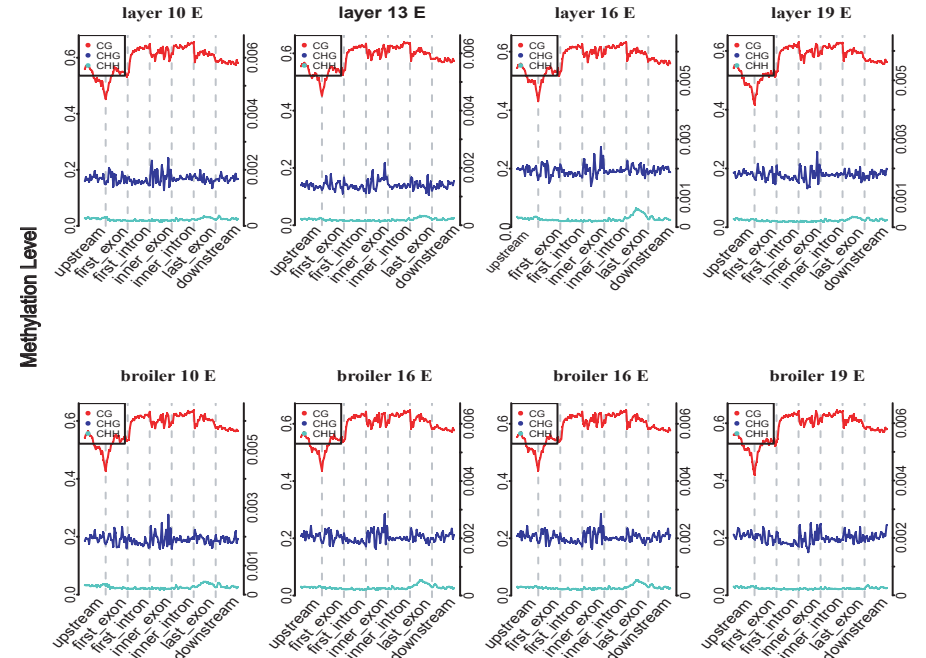

**Fig 3a**

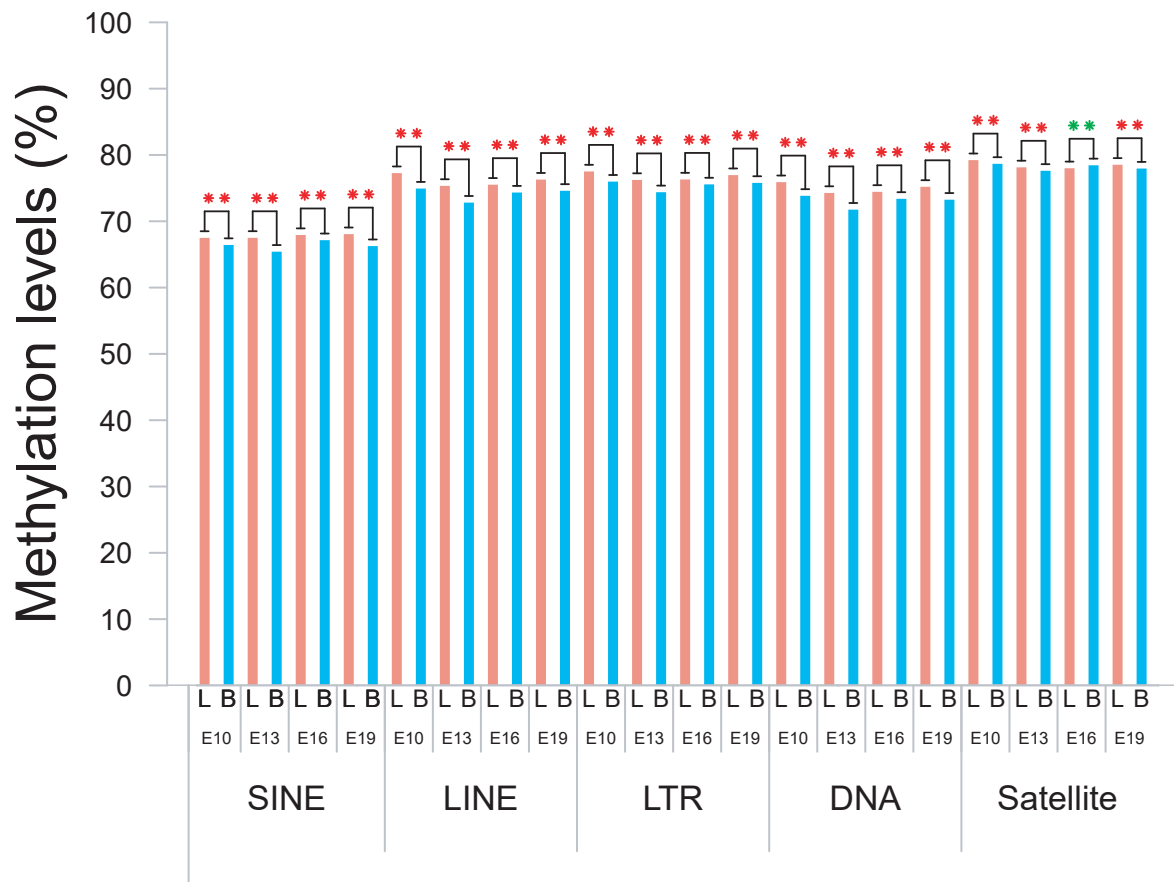

**Fig 3b**

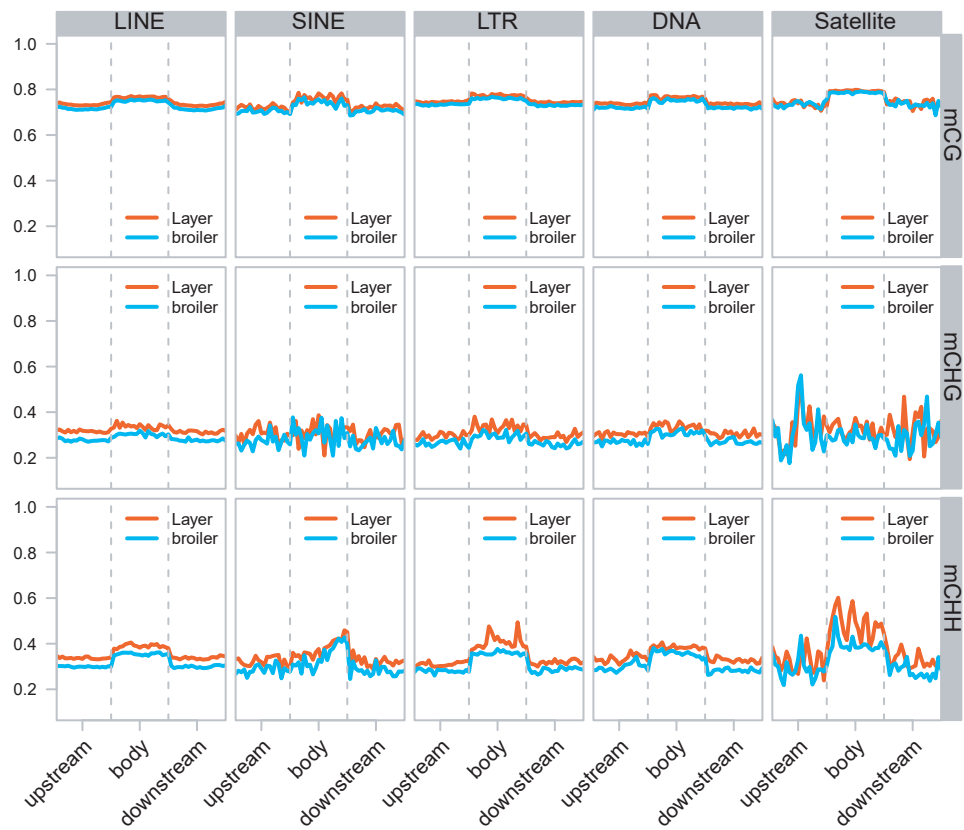

**Fig 4a**

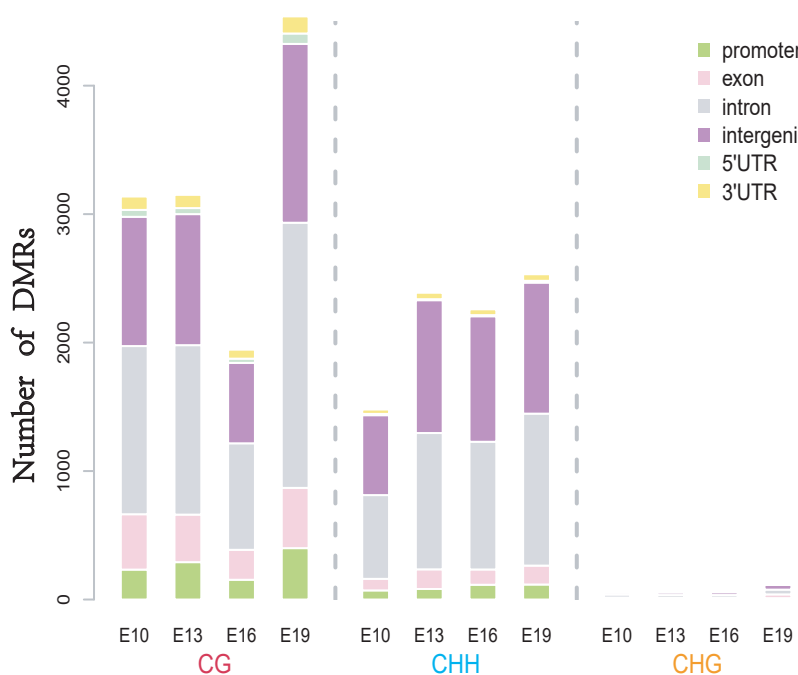

**Fig 4b**

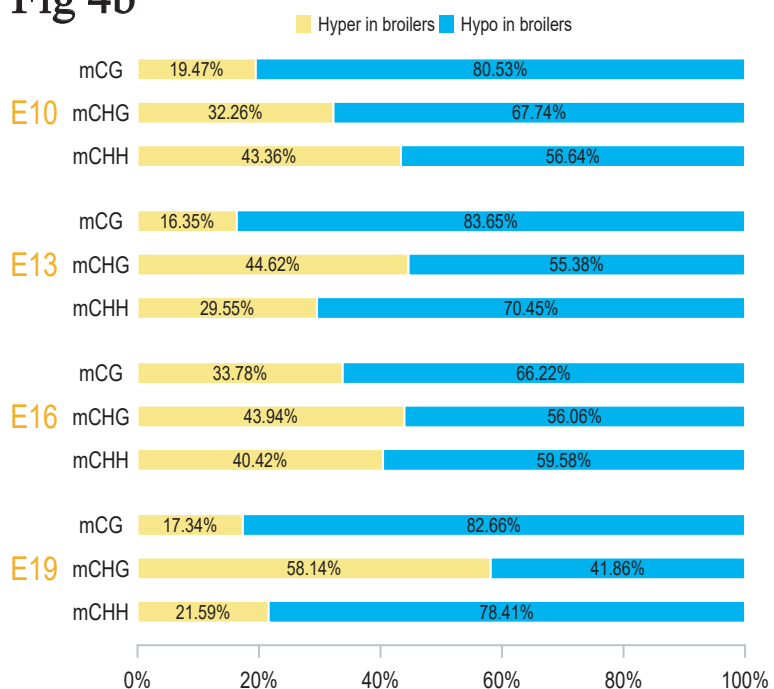

**Fig 4c**

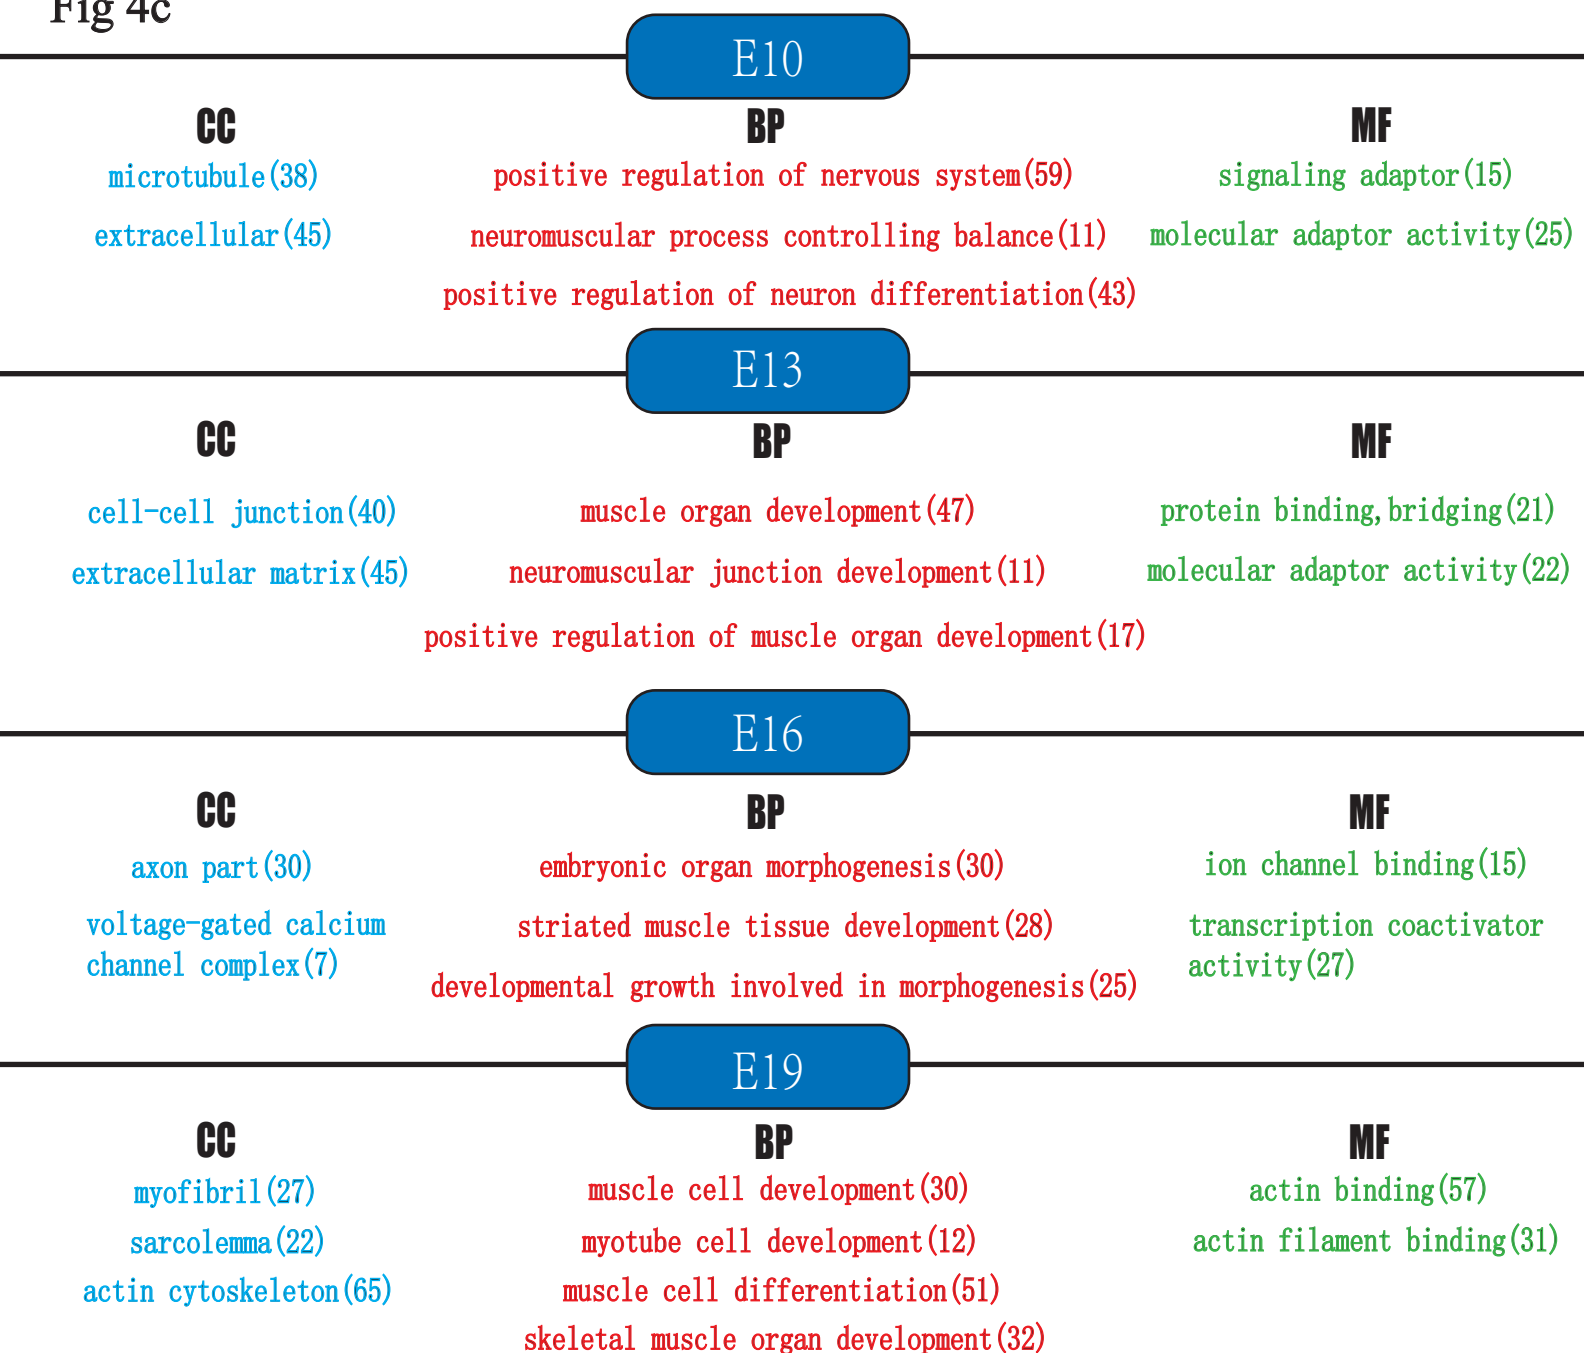

Fig 5a

Clustering Heatmap of 24 Samples Using Common DMRs

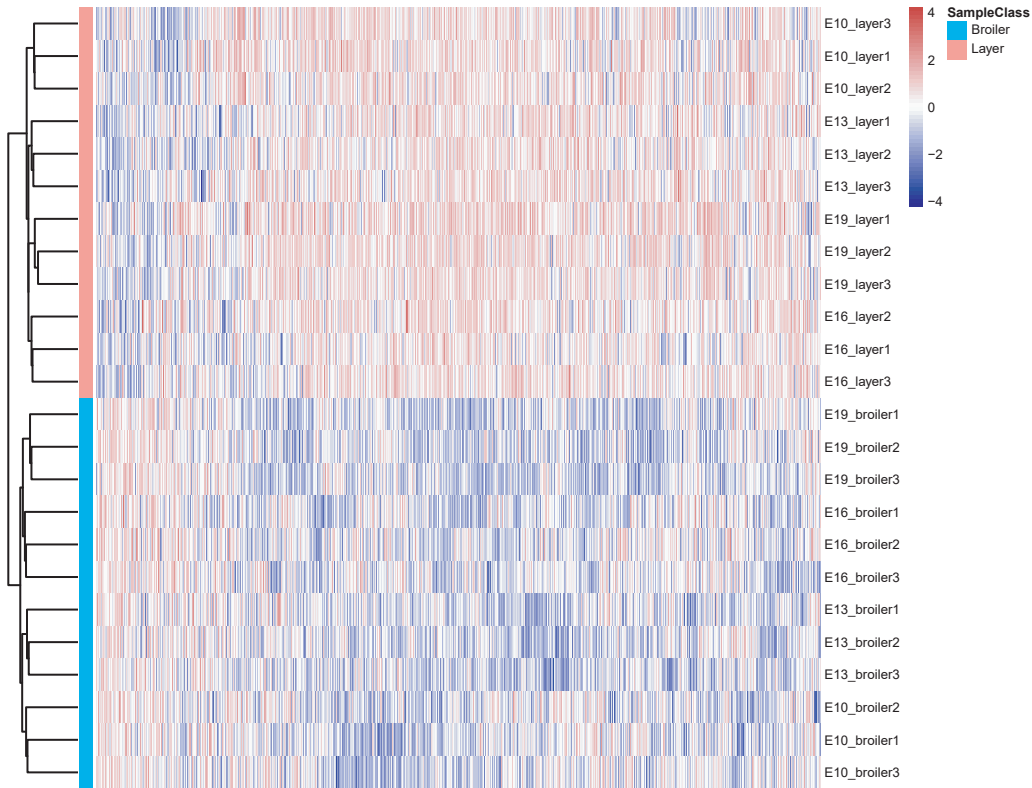

Fig 5b

Principle Analysis of 24 Samples Using Common DMRs

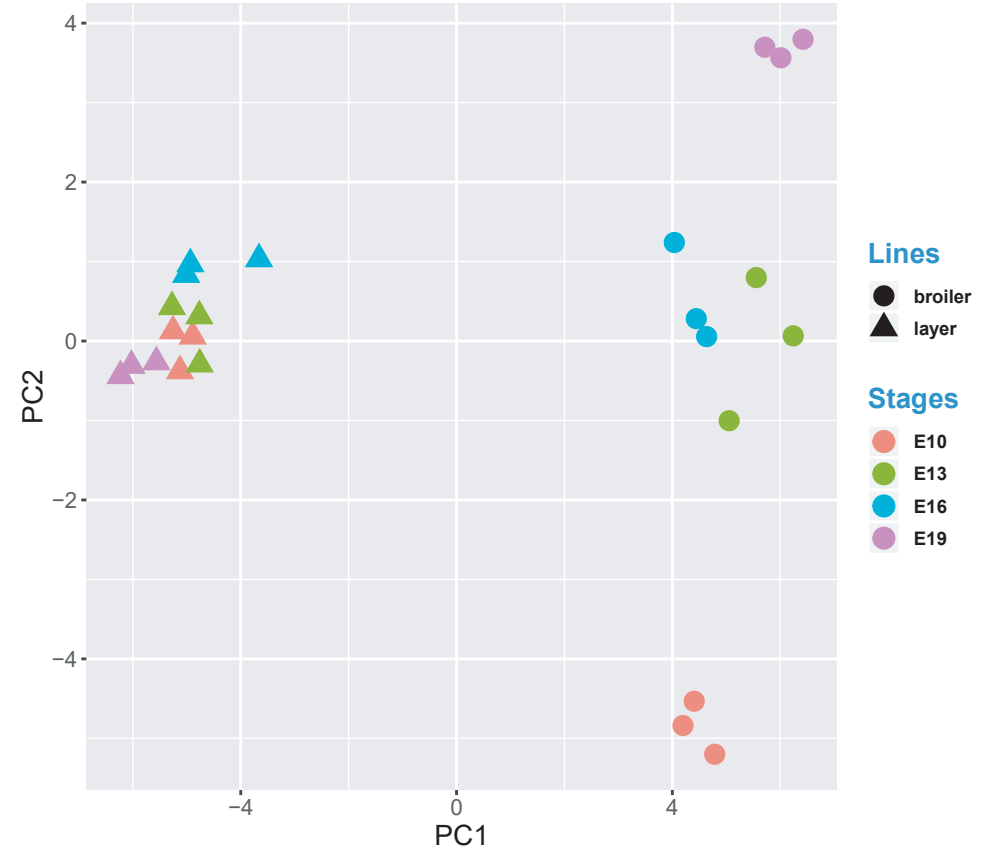

**Fig 6a**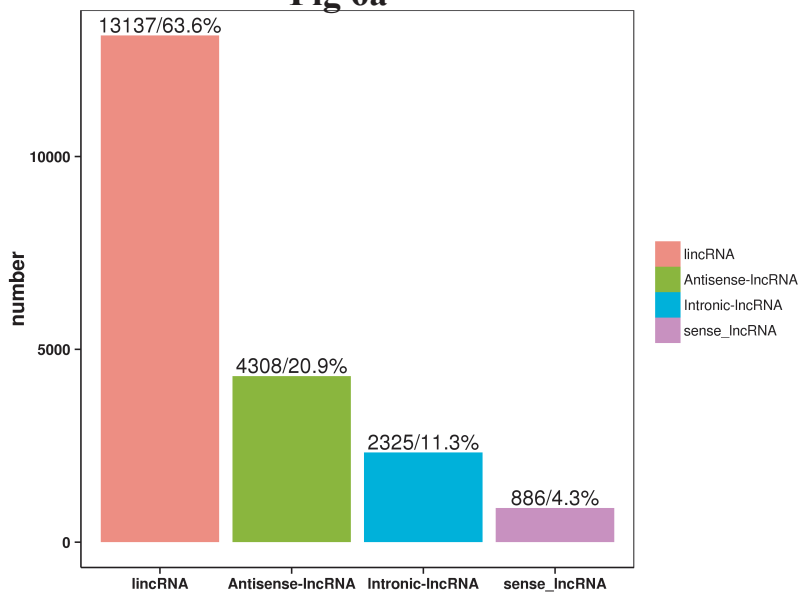**Fig 6b**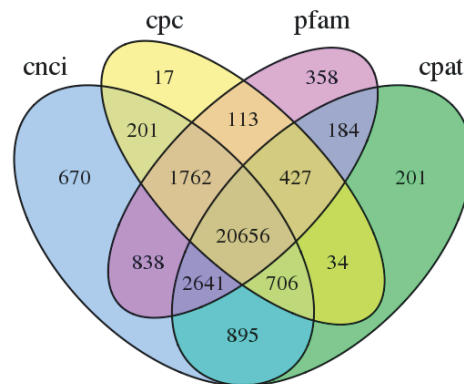**Fig 6c**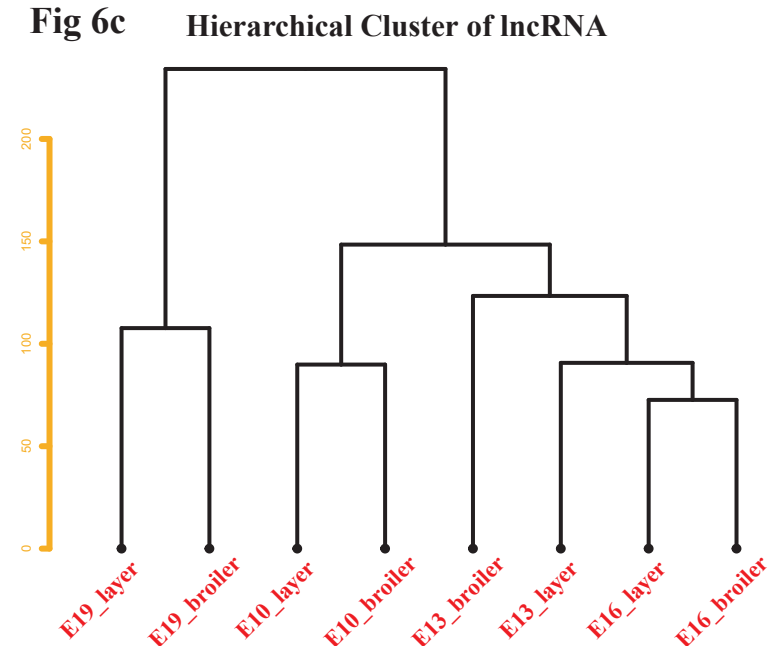**Fig 6d****Methylation level of genes**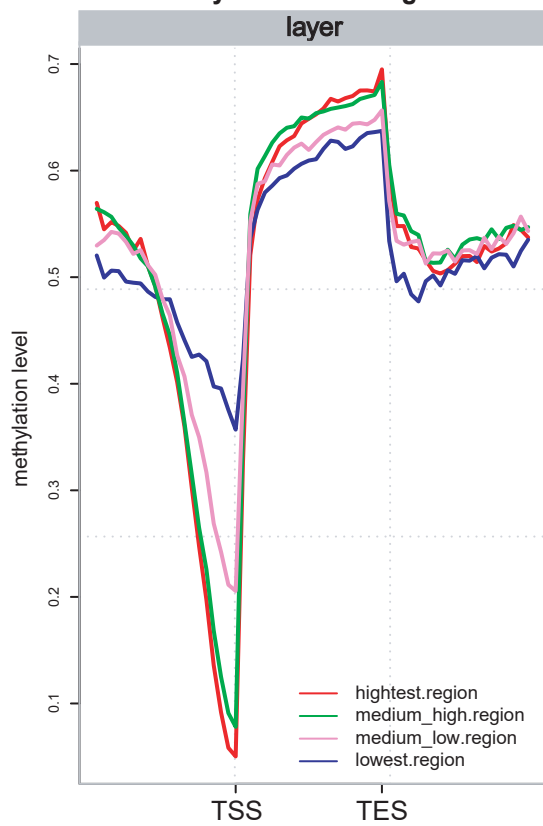**Fig 6e****Methylation level of genes**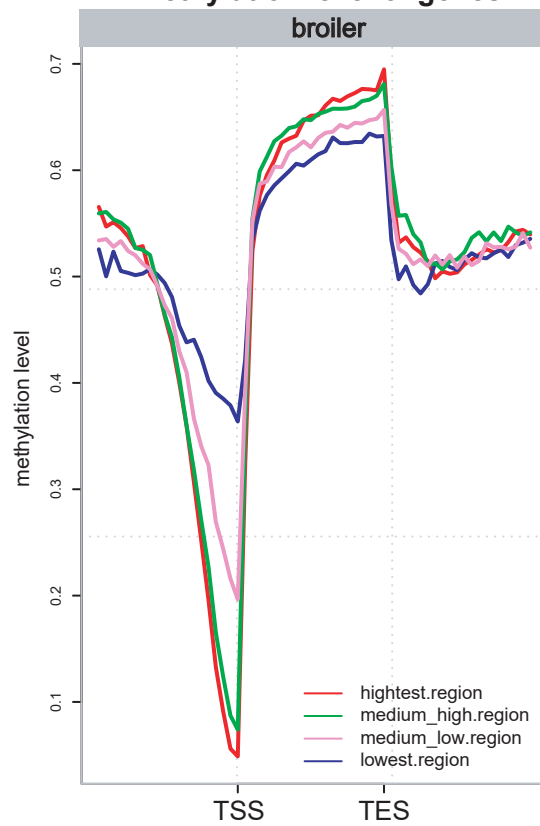**Fig 6f****Methylation level of lincRNAs**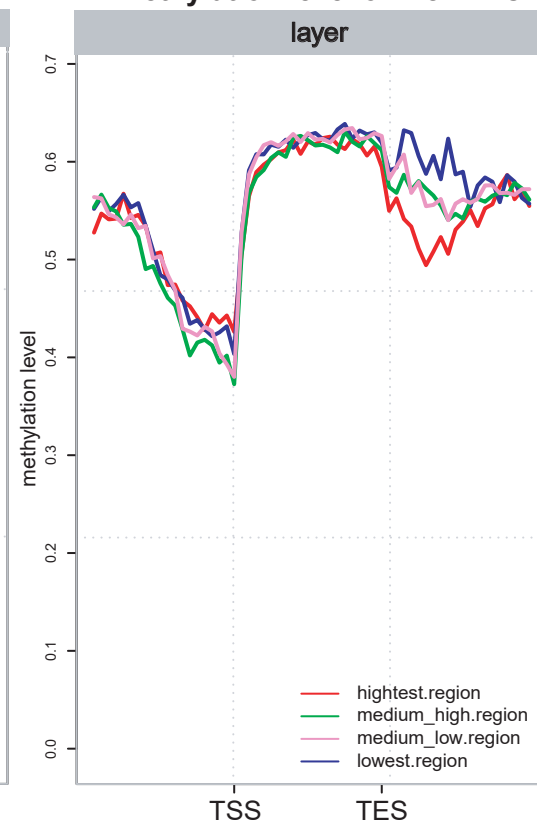**Fig 6g****Methylation level of lincRNAs**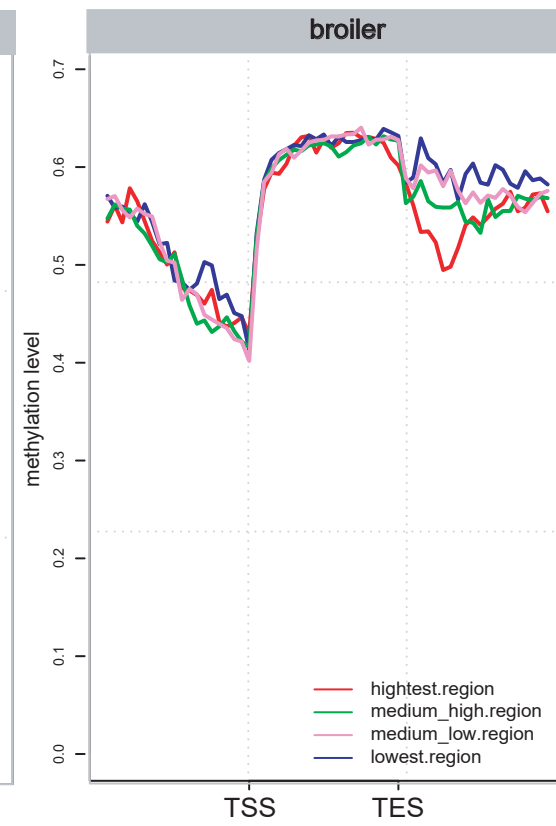

Fig 7a

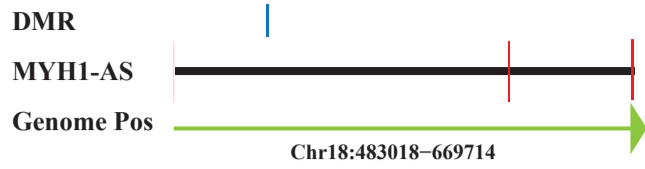

Fig 7b

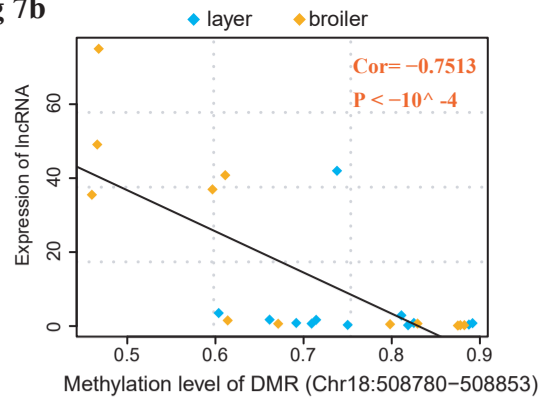

Fig 7c

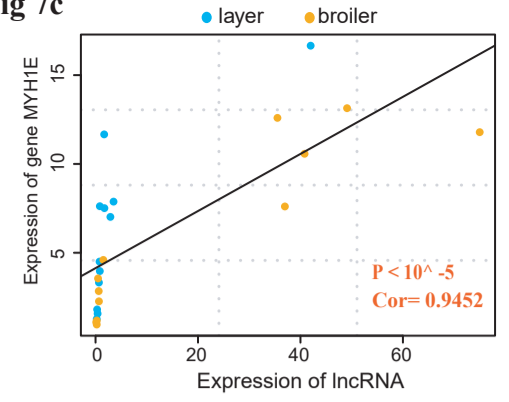

Fig 7d

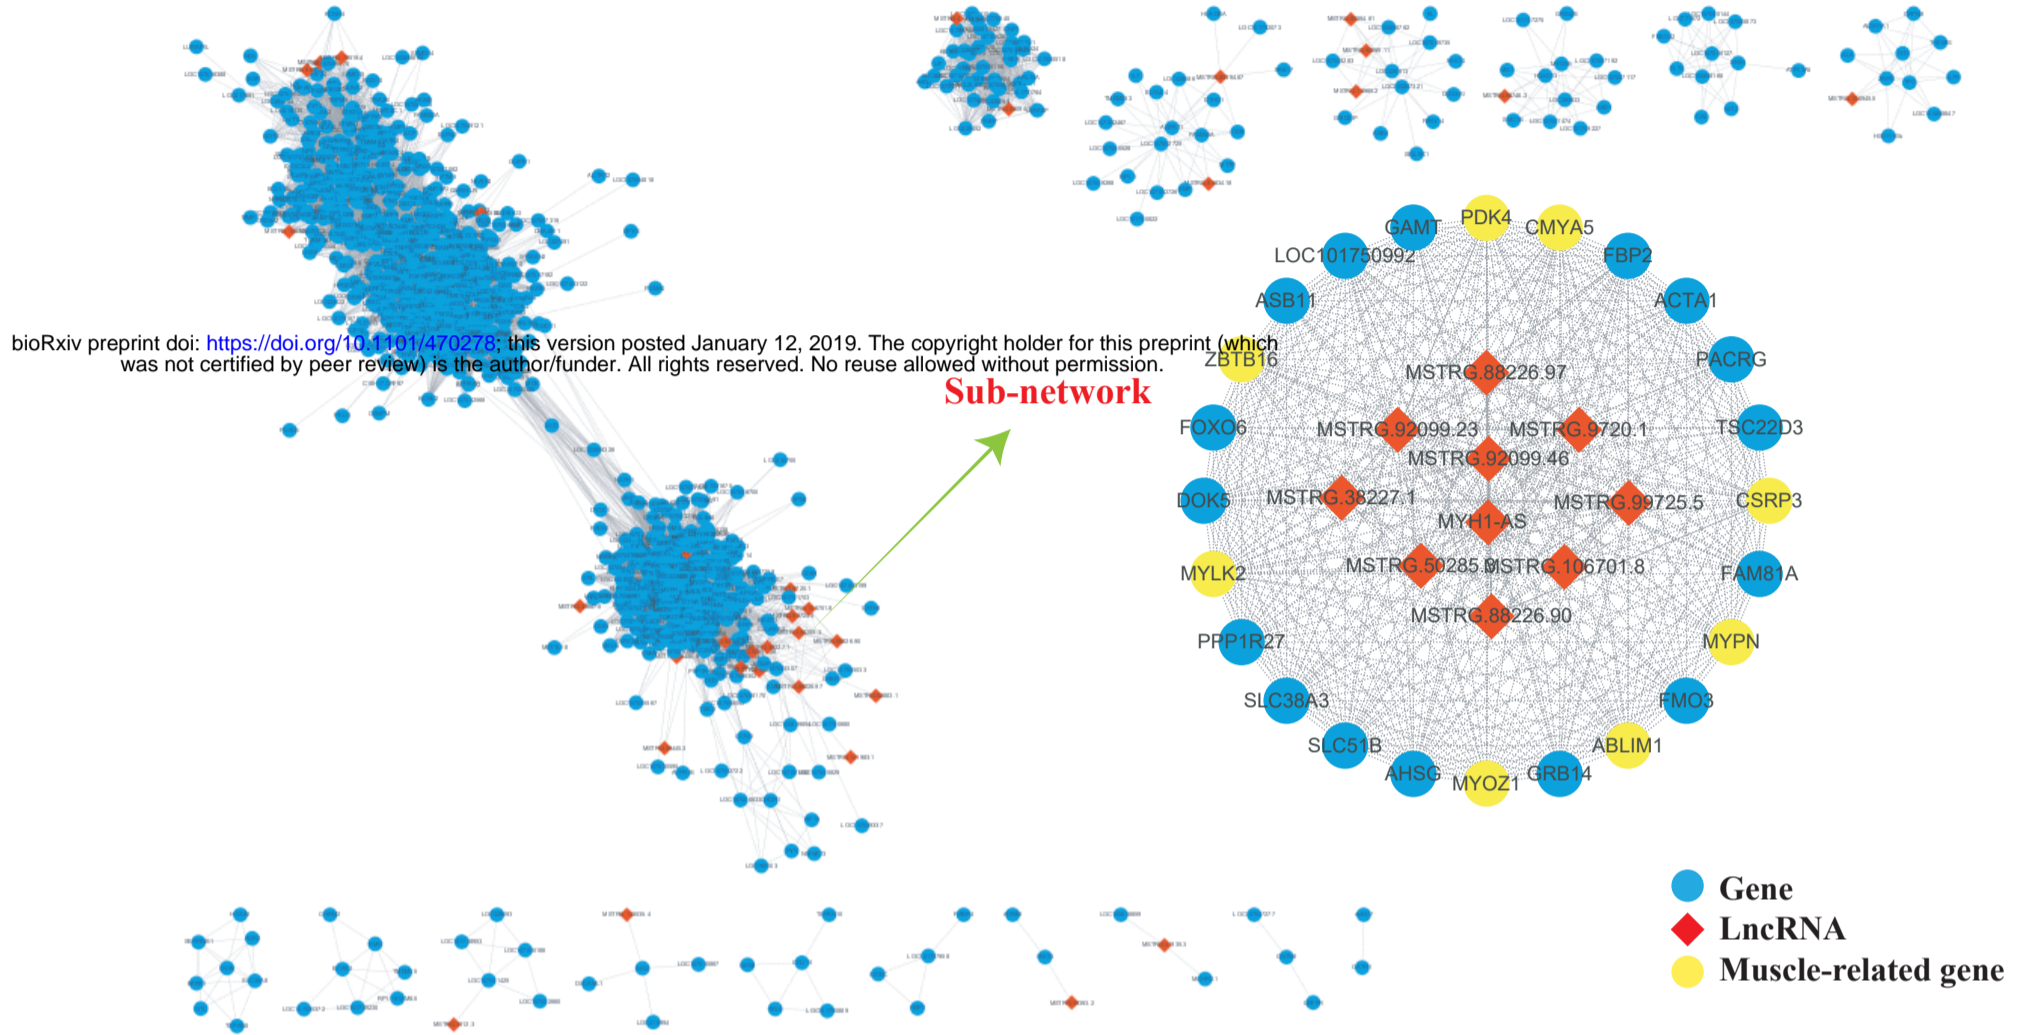

bioRxiv preprint doi: <https://doi.org/10.1101/470278>; this version posted January 12, 2019. The copyright holder for this preprint (which was not certified by peer review) is the author/funder. All rights reserved. No reuse allowed without permission.

Fig 7e

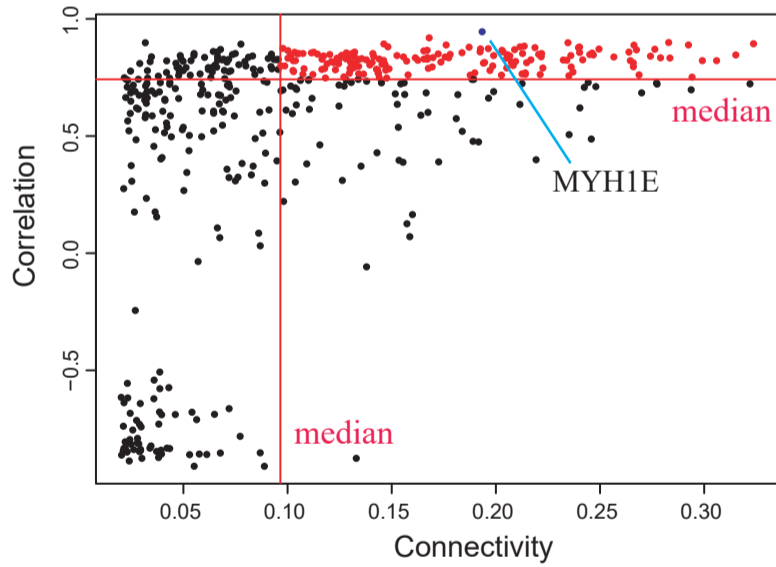

Fig 7f

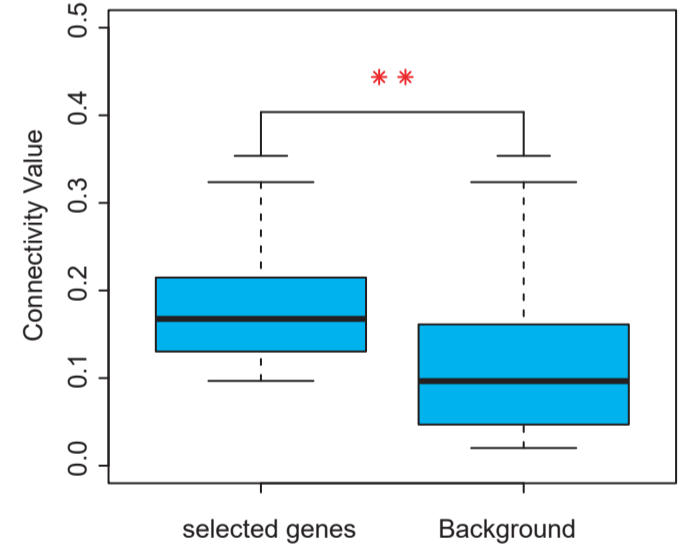

Fig 7g

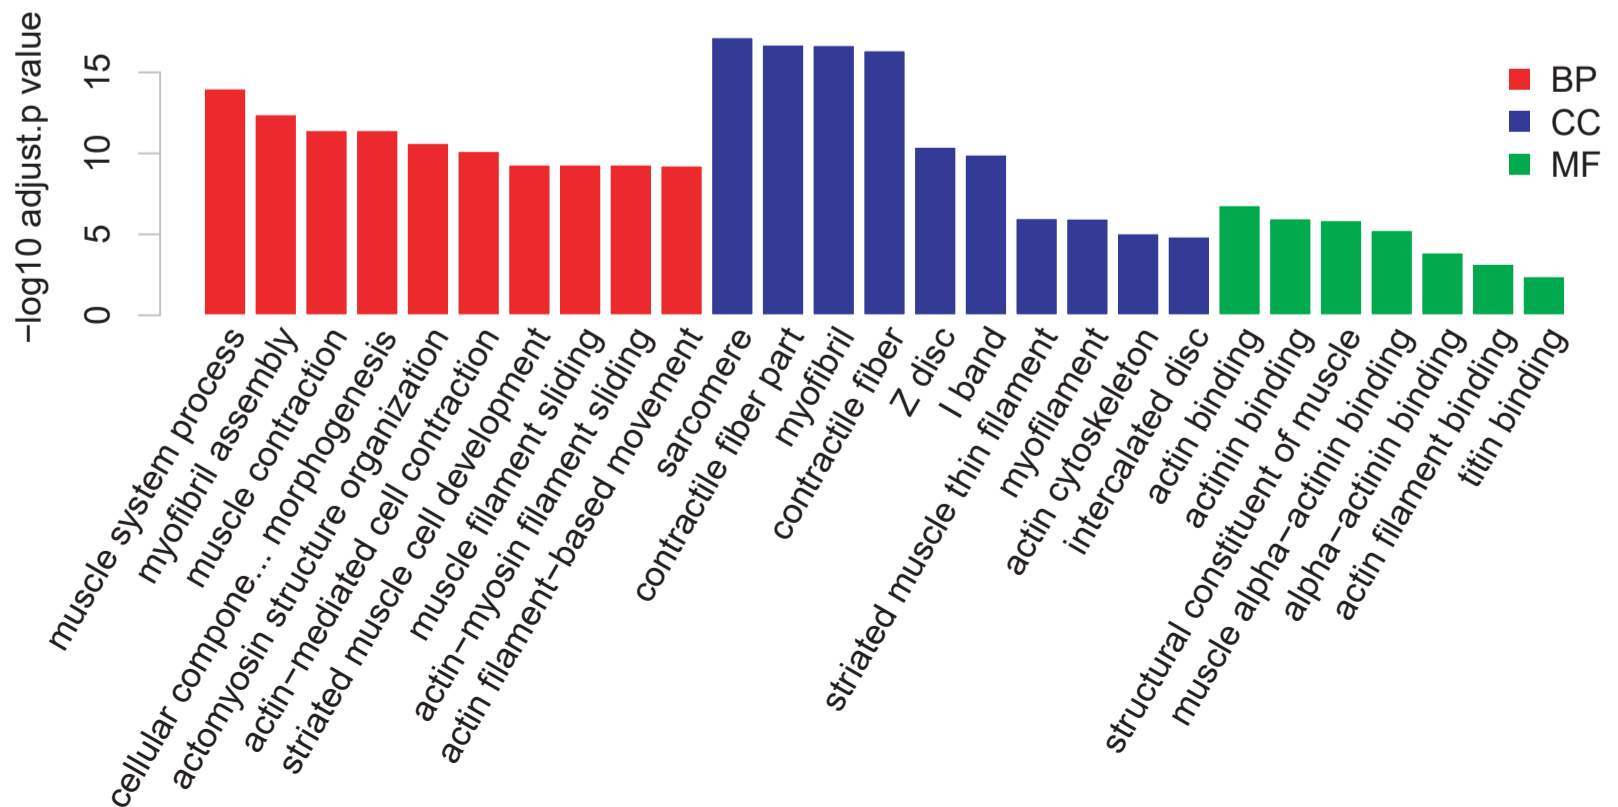

**Fig 8a**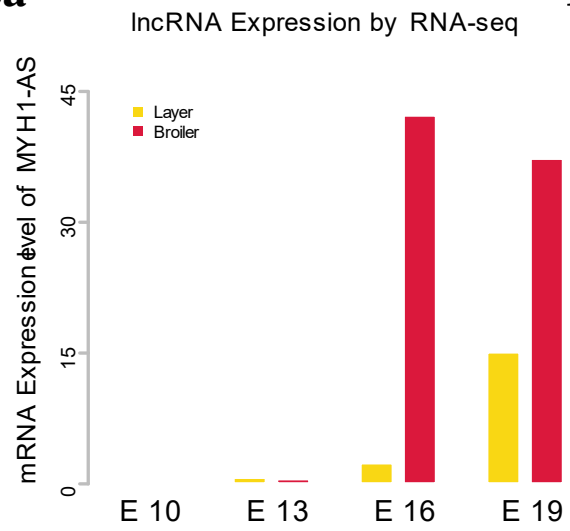**Fig 8b**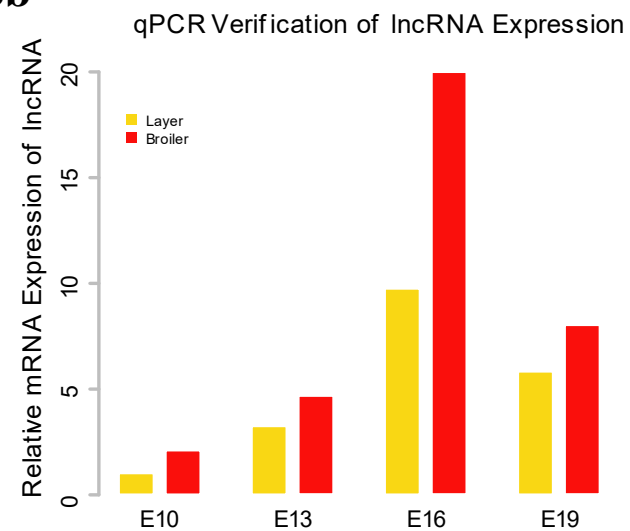**Fig 8c**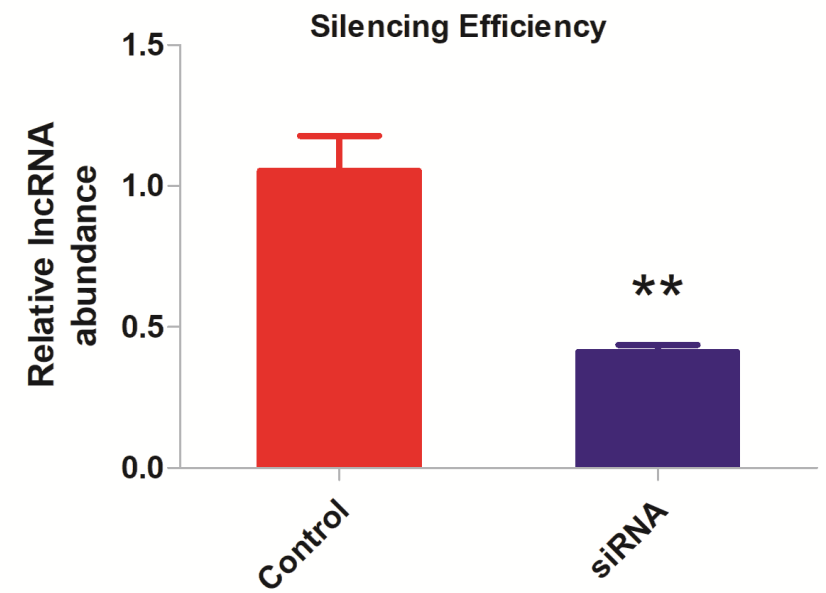**Fig 8d**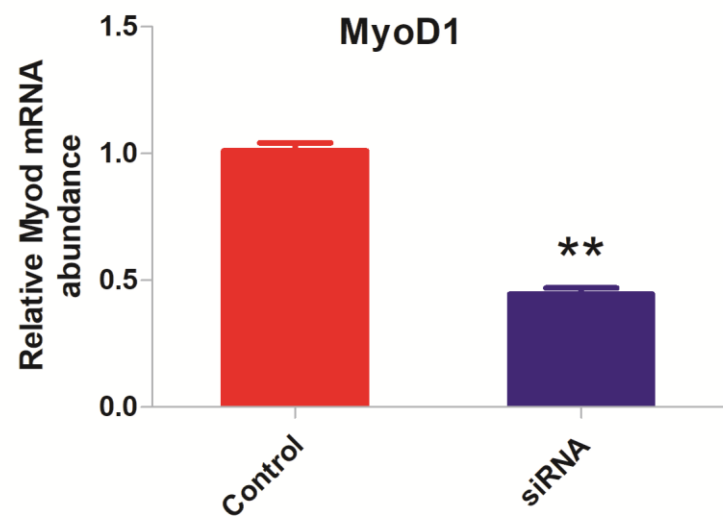**Fig 8e**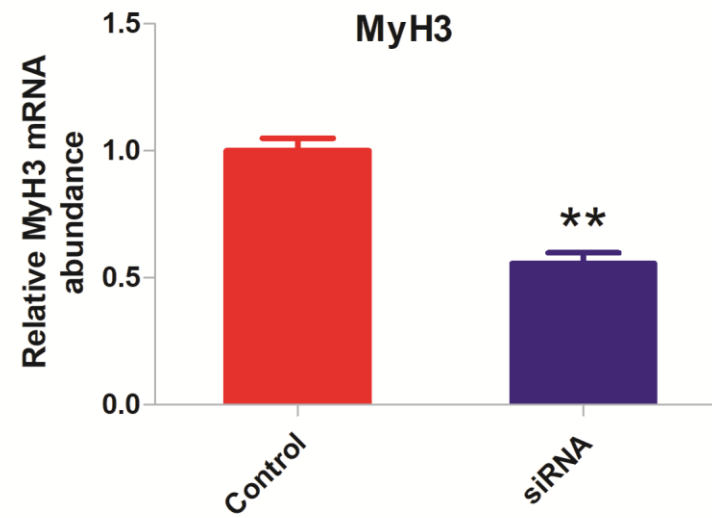**Fig 8f**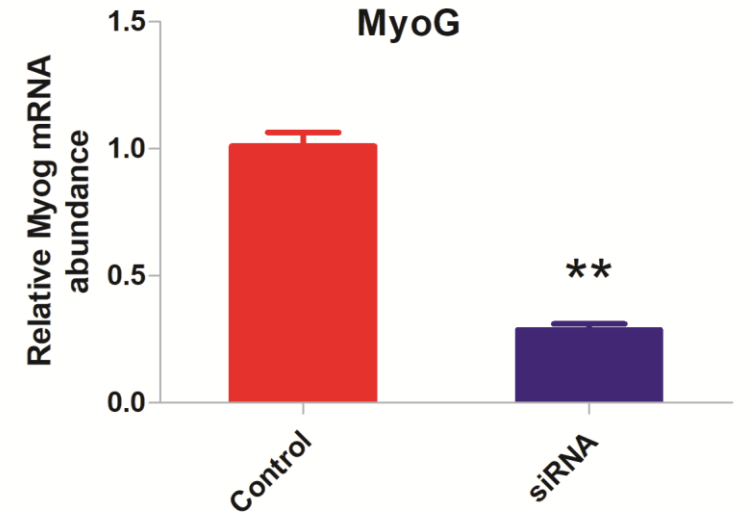**Fig 8g**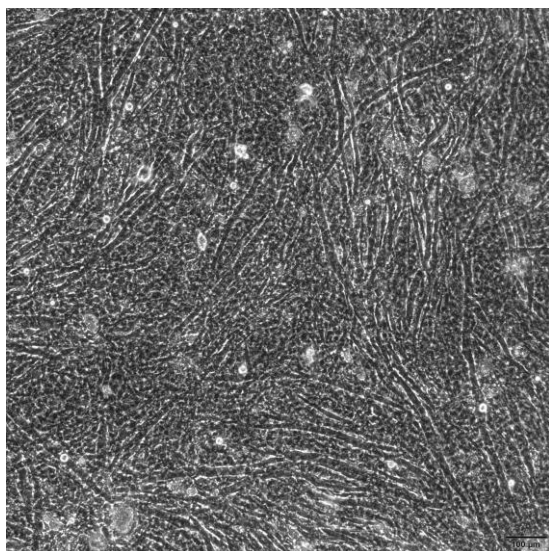**Fig 8h**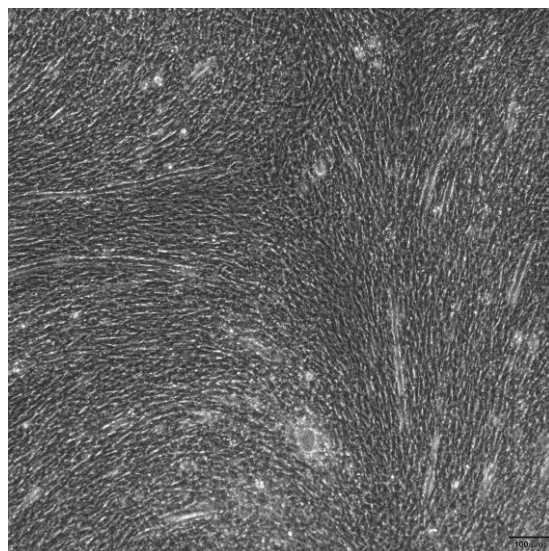**Fig 8i**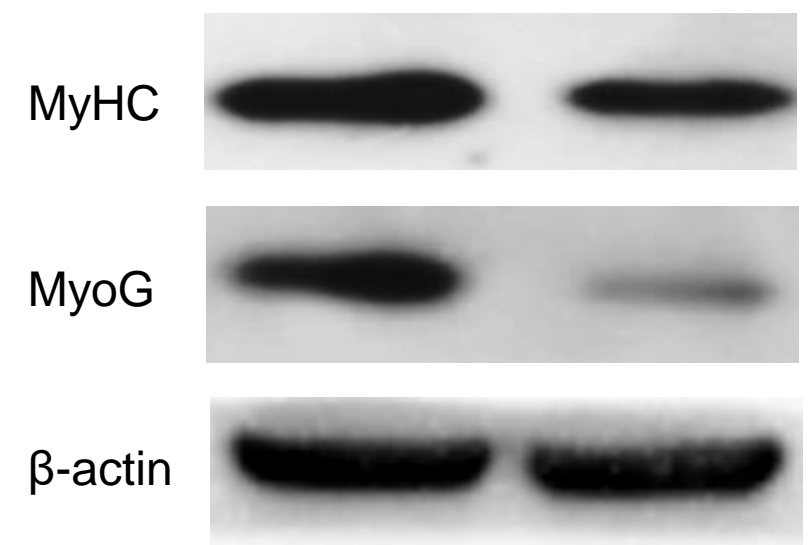

Source: https://www.biorxiv.org/content/10.1101/470278v6.full.pdf
